# 1 The Heritability of Pathogen Traits: Definitions and 2 Estimators

3 Venelin Mitov,<sup>\*,1,2</sup> Tanja Stadler,<sup>1,2</sup>

4 <sup>1</sup>Department of Biosystems, Science and Engineering (D-BSSE)

5 <sup>2</sup>Swiss Federal Institute of Technology (ETH), Zürich, Switzerland

6 \*Corresponding author: E-mail: [venelin.mitov@bsse.ethz.ch](mailto:venelin.mitov@bsse.ethz.ch)

7 Associate Editor:

## 8 Abstract

9 Pathogen traits, such as the virulence of an infection, can vary significantly between patients. A major  
10 challenge is to measure the extent to which genetic differences between infecting strains explain the  
11 observed variation of the trait. This is quantified by the trait’s broad-sense heritability,  $H^2$ . A recent  
12 discrepancy between estimates of the heritability of HIV-virulence has opened a debate on the estimators’  
13 accuracy. Here, we show that the discrepancy originates from model limitations and important lifecycle  
14 differences between sexually reproducing organisms and transmittable pathogens. In particular, current  
15 quantitative genetics methods, such as donor-recipient regression (DR) of surveyed serodiscordant couples  
16 and the phylogenetic mixed model (PMM), are prone to underestimate  $H^2$ , because they fail to model the  
17 gradual loss of phenotypic resemblance between transmission-related patients in the presence of within-  
18 host evolution. We explore two approaches correcting these errors: ANOVA on closest phylogenetic pairs  
19 (ANOVA-CPP) and the phylogenetic Ornstein-Uhlenbeck mixed model (POUMM). Empirical analyses  
20 reveal that at least 25% of the variation in HIV-virulence is explained by the virus genome both for  
21 European and African data. These results confirm the presence of significant factors for HIV virulence in  
22 the viral genotype and reject previous hypotheses of negligible viral influence. Beyond HIV, ANOVA-CPP  
23 is ideal for slowly evolving protozoa, bacteria and DNA-viruses, while POUMM suits rapidly mutating  
24 RNA-viruses, thus, enabling heritability estimation for a broad range of pathogens.

25 Key words: HIV, set-point viral load (spVL), donor-recipient regression, ANOVA, phylogenetic mixed  
26 model, Ornstein-Uhlenbeck

## 27 Introduction

28 Pathogens transmitted between donor and recipient hosts are genetically related much like children  
29 are related to their parents through inherited genes. This analogy between transmission and  
30 biological reproduction has inspired the use of heritability ( $H^2$ ) - a term borrowed from quantitative  
31 genetics (Falconer, 1996; Hartyl and Clark, 2007; Lynch and Walsh, 1998) to measure the contribution

32 of pathogen genetic factors to pathogen traits, such as virulence, transmissibility and drug-resistance of  
33 infections.

34 Two families of methods enable estimating the heritability of a pathogen trait in the absence of  
35 knowledge about its genetic basis:

- 36 • Resemblance estimators measuring the relative trait-similarity within groups of transmission-related  
37 patients. Common methods of that kind are linear regression of donor-recipient pairs (DR) (Fraser  
38 *et al.*, 2014; Leventhal and Bonhoeffer, 2016) and analysis of variance (ANOVA) of patients linked by  
39 (near-)identity of carried strains (Anderson *et al.*, 2010; Shirreff *et al.*, 2013).
- 40 • Phylogenetic comparative methods measuring the association between observed trait values from  
41 patients and their (approximate) transmission tree inferred from carried pathogen sequences. Common  
42 examples of such methods are the phylogenetic mixed model (PMM) (Housworth *et al.*, 2004) and  
43 Pagel’s  $\lambda$  (Freckleton *et al.*, 2002).

44 Most of these methods have been applied in studies of the viral contribution to virulence of an HIV  
45 infection (Alizon *et al.*, 2010; Bonhoeffer *et al.*, 2015; Fraser *et al.*, 2014; Hecht *et al.*, 2010; Hodcroft  
46 *et al.*, 2014; Hollingsworth *et al.*, 2010; Leventhal and Bonhoeffer, 2016; Lingappa *et al.*, 2013; Shirreff  
47 *et al.*, 2013; Tang *et al.*, 2004; van der Kuyl *et al.*, 2010; Yue *et al.*, 2013), quantified by  $\log_{10}$  set  
48 point viral load –  $\lg(\text{spVL})$  – the amount of virions per blood-volume stabilizing in HIV patients at  
49 the beginning of the asymptomatic phase and best-predicting its duration (Mellors *et al.*, 1996). In  
50 the view of discrepant reports of  $\lg(\text{spVL})$ -heritability, several authors have questioned the methods’  
51 accuracy (Fraser *et al.*, 2014; Leventhal and Bonhoeffer, 2016; Shirreff *et al.*, 2013). Shirreff *et al.* 2012  
52 used simulation of trait-values on existing HIV transmission trees to reveal that phylogenetic comparative  
53 methods report strongly under- or over- estimated values depending on the true heritability value used in  
54 the simulation (Shirreff *et al.*, 2013). Later, Fraser *et al.* 2014 claimed that DR is unbiased with respect to  
55  $\lg(\text{spVL})$ -heritability and is robust to trait-based selection for transmission (Fraser *et al.*, 2014). Finally,  
56 Leventhal and Bonhoeffer (2016) simulated Wright-Fisher generations of transmission confirming that DR  
57 outperforms PMM in terms of robustness and accuracy and suggesting that current phylogenetic methods  
58 are compromised by questionable assumptions, such as ultrametricity of trees (all measurements collected  
59 at the same time) and neutral evolution of the trait. These three studies assume that once the trait value  
60 is set in the recipient upon infection, it remains constant throughout its infectious time. This assumption  
61 is partially acceptable for  $\lg(\text{spVL})$ , see (Geskus *et al.*, 2007) and references therein, but it is highly  
62 arguable for pathogen traits in general, because mutations during infection are often associated with

63 phenotype changes, e.g. escape from adaptive immune response (Virgin *et al.*, 2009), drug resistance,  
64 or thermotolerance (Dessau *et al.*, 2012; Presloid *et al.*, 2016). The theory of heritability, which was  
65 developed by quantitative geneticists to study populations of animals and plants (Falconer, 1996; Hartyl  
66 and Clark, 2007; Lynch and Walsh, 1998), does not account for individual gradual evolution and other  
67 lifecycle differences between pathogens and mating species. This reveals the need for a careful transfer  
68 of the quantitative genetics terminology and methods to the domain of pathogen traits.

69 In the section “Overview on heritability”, we review the definitions of heritability for sexually  
70 reproducing organisms and discuss how these definitions are affected by the lifecycle differences between  
71 sexual species and pathogens. In the section “New Approaches”, we uncover the reasons for biases  
72 in current resemblance-based and phylogenetic estimators of heritability and explore two alternative  
73 approaches to overcome these biases. In the Results section, we compare the different heritability  
74 estimators using in-silico simulations of epidemics, and report a heritability analysis of spVL data from  
75 a large HIV cohort. Our results allow to establish a lower bound for the viral genetic contribution  
76 to set-point viral load. The Discussion section puts our modeling and empirical results into a broader  
77 perspective.

## 78 **Overview on heritability**

### 79 Heritability in sexual species

80 Jacquard (1983) noticed that the term “heritability” has been used by quantitative geneticists to serve  
81 three different concepts: (i) the genetic determination of a trait; (ii) the resemblance between relatives;  
82 (iii) the efficiency of selection. Hence, it may be confusing to use the term “heritability” without an  
83 accompanying definition or a qualifier like “narrow-sense”, “broad-sense” and “realized”. Below, we  
84 briefly introduce this terminology; formal definitions are written in the section Materials and Methods.

85 *Genetic determination.* Considering a real-valued (quantitative) trait, the degree to which the genes  
86 of individuals determine their trait-values is quantified in a statistical sense by the **broad-sense**  
87 **heritability**,  $H^2$ . Assuming a sufficiently large population and full knowledge of the distinct genetic  
88 variants (genotypes) influencing the trait,  $H^2$  can be measured by the coefficient of determination,  $R_{adj}^2$ ,  
89 obtained over a grouping of the population by genotype. In the world of animals and plants, though, it  
90 is impossible to measure  $H^2$  in this way, because population sizes are small compared to large numbers  
91 of (usually unknown) genotypes. Thus, quantitative genetics focuses on estimating a lower bound for  $H^2$   
92 – the **narrow-sense heritability**,  $h^2$ .  $h^2$  summarizes how much of the trait variance is attributable to  
93 single-locus additive genetic effects and, in sexually reproducing populations, it can be estimated from  
94 measures of the trait-resemblance between relatives.

95 *Resemblance between relatives.* Relatives resemble each other not only for carrying similar genes but also  
96 for living in similar environments. Hence, it is necessary to disentangle the concept of resemblance from  
97 that of genetic determination. For an ordered relationship such as parent-offspring, the resemblance is  
98 usually measured by the **regression slope**,  $b$ , of expected offspring values on mean parental values. For  
99 members of unordered relationships, such as identical twins, sibs and cousins, their relative resemblance  
100 is quantified by the one-way analysis of variance (ANOVA), which estimates the so-called **intra**  
101 **correlation** (ICC) denoted here as  $r_A$ [type of relationship].

102 *Efficiency of selection.* The last of the three concepts is that of the efficiency of selection for breeding  
103 of the individuals with “best” trait-values. This is quantified by the **realized heritability**,  $h_R^2$ , defined  
104 in Hartyl and Clark (2007) as the response to selection relative to the selection differential.

105 *Connecting the dots.* The success of quantitative genetics in the pre-genomic era relies on the insight that  
106 “*inferences concerning the genetic basis of quantitative traits can be extracted from phenotypic measures*  
107 *of the resemblance between relatives* (Lynch and Walsh, 1998)”. Mathematically, this quote is expressed  
108 as a set of approximations, which have become dogmatic in quantitative genetics:

$$H^2 = R_{adj}^2 \simeq r_A[\text{identical twins}]$$

109

$$h^2 \simeq b \simeq 4r_A[\text{half sibs}] \simeq h_R^2.$$

110 The first equation is valid in general, provided there is no strong maternal effect on the trait, the observed  
111 twins have been separated at birth and raised in independent environments and the assumptions of  
112 ANOVA such as normality and homoscedasticity are at least approximately met. The second equation,  
113 though, is provable only for diploid sexually reproducing species. This is because genetic segregation and  
114 recombination during sexual reproduction ensure that single-locus additive effects are inherited at bigger  
115 proportions (1/2 from each parent) compared to multi-locus (epistatic) interactions (i.e. 1/4 for 2-loci-,  
116 1/8 for 3-loci-interactions, etc) (Falconer, 1996; Lynch and Walsh, 1998).

117 In summary, in sexually reproducing populations, heritability is used to quantify to what extent the  
118 genetics explain a trait (broad-sense heritability,  $H^2$ ) as well as to measure or predict the response to  
119 trait-based selection for reproduction (realized heritability,  $h_R^2$ ). Since it is practically hard to measure  $H^2$ ,  
120 one often uses empirical measures of the resemblance between relatives (i.e. parent-offspring regression,  
121  $b$ , or ICC from half sibs,  $r_A$ ) to estimate the extent, to which single-locus additive effects determine the  
122 trait (narrow-sense heritability,  $h^2$ ). It turns out that  $h^2 \simeq h_R^2$ , justifying the dual role of  $h^2$  as a measure  
123 of genetic determination and a measure for the rate of trait-evolution resulting from selection.

124 Transfer to pathogen traits

125 The transfer of the above terminology from traits of diploid organisms to pathogen traits is almost  
126 verbatim and only requires substituting “pathogen genes” for “organism genes”, “donor value” for  
127 “parental value” and “recipient value” for “offspring value”. However, three important differences between  
128 the lifecycles of diploid organisms and pathogens alter the connections between the definitions and the  
129 estimators:

130 • **Asexual haploid nature of pathogen transmission**

131 The first difference is that, unlike reproduction of diploid organisms, the transmission of a pathogen  
132 from a donor to a recipient is more similar to asexual reproduction in haploid organisms, because,  
133 typically, whole pathogens get transferred between hosts. Importantly, in the absence of genetic  
134 segregation and recombination at transmission, there is no preference in transmitting single-locus  
135 over multi-locus genetic effects.

136 • **Partial quasispecies transmission**

137 The second difference is that the transmitted proportion of genetic information characterizing the  
138 pathogen in the donor is unknown and varying between transmission events. For example, for slowly  
139 evolving bacteria such as *Micobacterium tuberculosis* (Mtb), transmission can be clonal (Bjorn-  
140 Mortensen *et al.*, 2016), whereas, for rapidly evolving retroviruses like HIV, transmission is often  
141 accompanied by bottlenecks causing only a tiny sample of the large and genetically diverse virus  
142 population in the donor (aka quasispecies) to penetrate and survive in the recipient (Keele *et al.*,  
143 2008).

144 • **Within-host pathogen evolution**

145 The third difference involves the change in phenotypic value due to within-host pathogen mutation and  
146 recombination. While genetic change is rare during the lifetime of animals and plants and its phenotypic  
147 effects are typically delayed to the offspring generations, it constitutes a hallmark in the lifecycle of  
148 pathogens and causes a gradual or immediate phenotypic change such as increasing virulence, immune  
149 escape or drug resistance.

150 For equal genotypes in donor and recipient as well as for distributions of donors and recipients being  
151 equal to the total population distribution, the estimators  $b$  and  $r_A$  evaluated on transmission pairs would  
152 be unbiased with respect to  $H^2$ . This has been shown in theory (Fraser *et al.*, 2014). Further, Leventhal  
153 and Bonhoeffer (2016) showed through simulations that DR is accurate in the case of minute evolution  
154 in the recipient host upon infection. In their simulation, partial quasispecies transmission and gradual

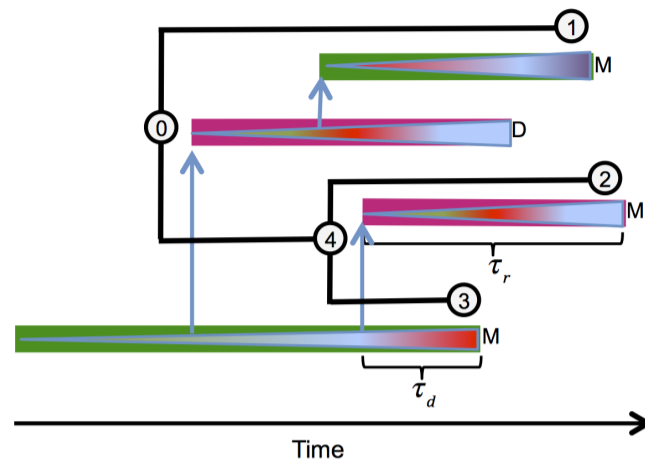

**FIG. 1. A schematic representation of an epidemic.** Colored rectangles represent infectious periods of hosts, different colors corresponding to different host types. Triangles inside hosts represent pathogen quasispecies, change of color indicating substitution of dominant strains. Capital letters denote host-events: M: phenotype measurement and recovery; D: host death. Vertical arrows show the time and direction of transmission events. The within-donor and within-recipient measurement delays,  $\tau_d$  and  $\tau_r$ , are shown for one donor-recipient couple. The transmission tree connecting the measured hosts is drawn

in black (shifted up-left for visualization purpose). Notice that, due to incomplete sampling, some infectious periods (colored rectangles) are shorter than their corresponding lineages on the tree. Couples of tips that are each other's closest tip by phylogenetic distance, e.g. (2,3), are called "phylogenetic pairs" (PPs). With some exceptions, PPs coincide with pairs of tips descending from the same parent node (a.k.a. siblings or "cherries").

155 within-host evolution throughout the infection is ignored. We notice, though, that these two phenomena  
 156 cause a negative bias in  $b$  and  $r_A$  as estimator of  $H^2$ , because they co-act for the loss of resemblance  
 157 without affecting  $H^2$  in any way. Thus,  $b$  and  $r_A$  should be regarded as statistics summarizing the  
 158 resemblance in transmission couples observable after partial quasispecies transmission and delay between  
 159 transmission and measurements. Further in the text, we use the symbols  $b_\tau$  and  $r_{A,\tau}$  to emphasize that  
 160 these estimators have been calculated on a sample of donors and recipients with (variable) periods  $\tau_d$   
 161 and  $\tau_r$  between transmission and measurements,  $\tau = \tau_d + \tau_r$  denoting the total amount of time between  
 162 measurements (fig. 1). By contrast, we use  $b_0$  and  $r_{A,0}$  to emphasize that the calculation has been done  
 163 on the immediate trait-values right after transmission.

164 *Phylogenetic heritability.* As an alternative to resemblance-based methods, it is possible to fit a parametric  
 165 model of the trait-evolution along the branches of the transmission tree connecting the patients (fig. 1).  
 166 For example, the phylogenetic mixed model (PMM) (Housworth *et al.*, 2004; Lynch, 1991) assumes an  
 167 additive model of the trait-values,  $z(t) = g(t) + e$ , in which  $z(t)$  represents the trait-value at time  $t$  for a  
 168 given lineage of the tree,  $g(t)$  represents a heritable (genotypic) value at time  $t$  for this lineage and  $e$   
 169 represents a non-heritable contribution representing the sum of cumulative environmental effects on the  
 170 trait and measurement error.

The PMM assumes that  $g(t)$  evolves along the tree according to a branching Brownian motion process defined by the stochastic differential equation:

$$\begin{aligned} dg(t) &= \sigma dW_t, \\ g(0) &= g_0 \end{aligned} \tag{1}$$

171 where  $g_0$  is the initial genotypic value at the root,  $W_t$  is the standard Wiener process and  $\sigma > 0$  is the  
172 unit-time standard deviation (Grimmett and Stirzaker, 2001).

173 The environmental contribution  $e$  can change along the tree in any way as long as the values  $e$  at the  
174 tips are independent and identically distributed (i.i.d.) normal with mean 0 and variance  $\sigma_e^2$ . In the case  
175 of an epidemic,  $e$  represents the contribution from an individual’s immune system; it obtains a value  
176 at the beginning of an infection, which can stay constant or change during the course of an infection,  
177 but is uncorrelated to the immune systems of other hosts. Denoting by  $\bar{t}$  the mean root-tip distance in  
178 the tree, the **phylogenetic heritability** is defined as the expected proportion of phenotypic variance  
179 attributable to  $g$  at the tips:

$$H_{BM}^2 = \bar{t}\sigma^2 / (\bar{t}\sigma^2 + \sigma_e^2). \tag{2}$$

180 For rapidly evolving pathogens, such as RNA viruses, it is possible to infer the approximate transmission  
181 tree from pathogen sequences sampled at the moment of trait measurement (Hu *et al.*, 2004). This has  
182 inspired the use of PMM to estimate lg(spVL)-heritability in HIV patients (Alizon *et al.*, 2010; Hodcroft  
183 *et al.*, 2014; Shirreff *et al.*, 2013). However, this approach has been questioned in recent simulation tests  
184 reporting strongly positively or negatively biased PMM estimates with respect to the simulated  $H^2$   
185 (Leventhal and Bonhoeffer, 2016; Shirreff *et al.*, 2013).

186 *Summary.* In summary, for pathogen traits, measures of resemblance, such as  $b_0$  and  $r_{A,0}$ , should be  
187 considered as estimates of  $H^2$ , compromised by quasispecies differences, rather than estimates of  $h^2$ .  
188 In the absence of genetic segregation and recombination at transmission,  $h^2$  loses its dual role as an  
189 accessible measure of genetic determination and as a predictor for the rate of evolution. Due to delayed  
190 diagnosis, data from transmission couples for estimating  $b_0$  and  $r_{A,0}$  is rarely available in practice, while  
191  $b_\tau$  and  $r_{A,\tau}$  are negatively biased due to gradual within-host evolution. Phylogenetic methods, such as  
192 PMM, should provide an alternative for estimating  $H^2$  but recent simulation tests suggest that these  
193 methods are not well suited to the study of pathogen traits.

## 194 **New Approaches**

195 In this section, we first show through a real world example that the current methods, both resemblance-  
196 based and phylogenetic, are prone to strong negative bias in estimating  $H^2$ . As a principal cause, we reveal



197 the inability of these methods to model the gradual loss of phenotypic resemblance between transmission  
198 related patients as a function of their phylogenetic distance. Then, we propose two alternative approaches  
199 to account for this phenomenon. Finally, we design a toy model of an epidemic, which we use as a  
200 validation tool for the different heritability estimators.

#### 201 Uncovering biases in current heritability estimators

202 Previous studies of malaria and HIV have used clustering of the tips in the transmission tree to identify  
203 donor-recipient couples (Hecht *et al.*, 2010; Hollingsworth *et al.*, 2010; Shirreff *et al.*, 2013) or groups  
204 of transmission related patients (Anderson *et al.*, 2010). In particular, Shirreff *et al.* (2013) defines the  
205 method of phylogenetic pairs (PP) as ANOVA on pairs of tips in the transmission tree that are mutually  
206 nearest to each other by phylogenetic distance ( $\tau$ ) (fig. 1). Taking this approach a step further, we order  
207 the PPs by  $\tau$  and split them into bins of equal size, evaluating the correlation between pair trait-values  
208 ( $r_A$ ) in each bin. An analysis of 1912 PPs extracted from a recently published transmission tree of 8473  
209 HIV patients (Hodcroft *et al.*, 2014) reveals a well pronounced decrease of the correlation between pair-  
210 values (black points and vertical bars on fig. 2). For small  $\tau$  (left-most bin), the correlation  $r_A$  is far  
211 above the 95% CI estimated by the PP-method (thick grey horizontal bar), while, for big values of  $\tau$ ,  $r_A$   
212 falls below the 95% CI estimated by the PP-method. A similar pattern is observed when applying DR  
213 (using  $b$  instead of  $r_A$  upon assigning a donor and a recipient at random in each phylogenetic pair; results  
214 not shown). Being ignorant of  $\tau$ , all resemblance-based methods average over  $\tau$  in the observed sample  
215 of pairs. Thus, these methods should be considered negatively biased in general. They can approximate  
216 the true  $H^2$  in the population only in the limit  $\tau \rightarrow 0$  and up to additional sources of bias such as partial  
217 quasispecies transmission and differences in the distributions of donors, recipients and total population.

218 Further, we repeatedly simulate trait-values on the transmission tree under the maximum likelihood  
219 fit of the PMM method and re-evaluate the correlation in the same bins of PPs. Plotting the resulting  
220 correlation estimates from the simulations next to the correlation in the original data shows that PMM  
221 does not reproduce the gradual loss of correlation as a function of  $\tau$  (brown points and vertical bars  
222 on fig. 2). To understand the reason for that, we consider the initial assumption of the PMM method.  
223 According to Brownian motion, the covariance between the values of a pair of tips ( $ij$ ) is proportional  
224 to the distance  $t_{ij}$  from the root to their most recent common ancestor (mrca):

$$\Sigma_{BM,ij} = \sigma^2 t_{ij}. \quad (3)$$

225 Without an additional requirement for ultrametricity of the tree (all tips at equal distance from the  
226 root), this assumption does not imply a relationship between the covariance and the phylogenetic distance



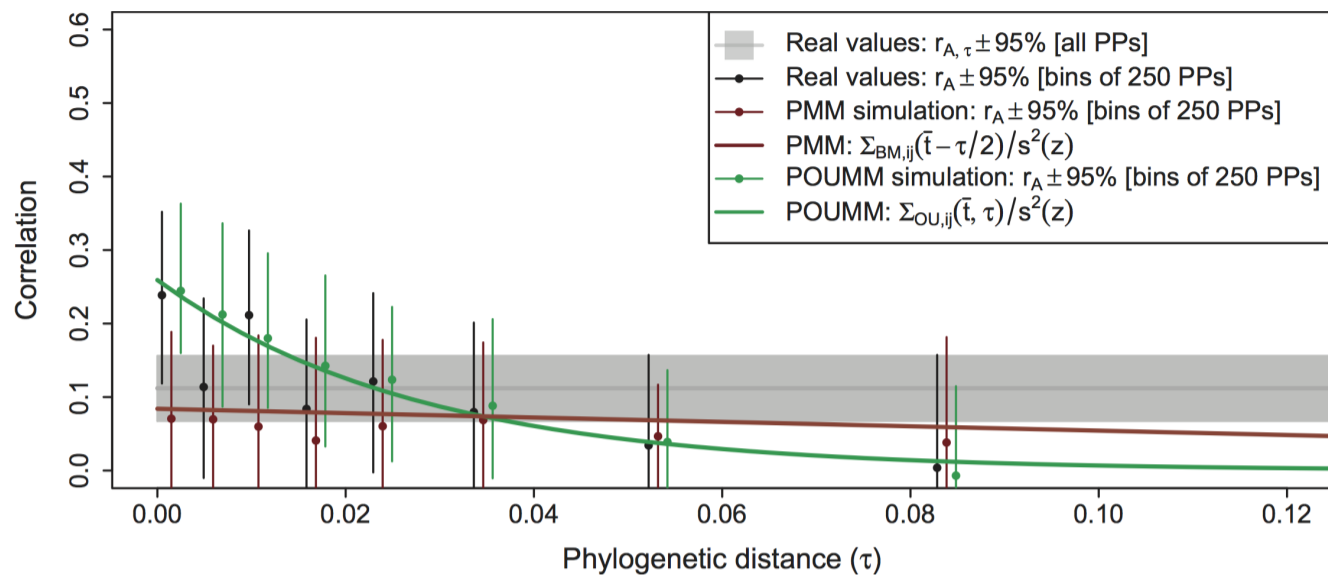

**FIG. 2. Gradual loss of phenotypic resemblance between transmission related patients.** A sample of PPs with real  $\lg(\text{spVL})$ -measurements from HIV patients shows a decrease in the correlation (ICC) between pair trait-values as a function of the pair phylogenetic distance  $\tau$ . The PPs have been ordered according to  $\tau$  and split into bins of 250 PPs (i.e. 500 patients). A thin and a thick grey horizontal bars denote the correlation with 95% CI in all PPs; black points with vertical bars denote the correlation with 95% CI within each bin. Brown and green points with vertical bars denote the mean correlation and 95% CI obtained after replacing the real trait values on the tree by values simulated under the maximum likelihood fit of the PMM and the POUMM methods respectively (mean and 95% CI estimated from 40 replications). A brown and a green line show the expected correlation between pairs of tips at distance  $\tau$  as modeled by the PMM and the POUMM method: for PMM, this is the normalized covariance  $\Sigma_{BM,ij}$  at the mean distance  $\bar{t} - \tau/2$  from the root to the

pair’s most recent common ancestor (eq. 3); for POUMM, this is the normalized covariance  $\Sigma_{OU,ij}$  at the mean root-tip distance  $\bar{t}$  and tip-pair distance  $\tau$  (eq. 7). To approximate correlation, both covariances have been normalized by the total phenotypic variance,  $s^2(z)$ .

227 between the tips. In real non-ultrametric transmission trees, though, we observe a rapid loss of covariance  
 228 as  $\tau$  increases, while there is only a weak relationship between covariance and root-mrca distance. The  
 229 latter is reflected also by a nearly horizontal slope of the expected covariance between PPs at distance  $\tau$   
 230 modeled under PMM as a function of their mean root-mrca distance ( $\bar{t} - \tau/2$ ),  $\bar{t}$  denoting the mean root-  
 231 tip distance (brown line on fig. 2). We conclude that the BM assumption is inappropriate for modeling the  
 232 evolution of pathogen traits along transmission trees. Instead, we need to model the covariance between  
 233 trait-values at the tips as a function of their phylogenetic distance.

234 New estimators of pathogen trait heritability

235 *ANOVA on closest PPs.* Assuming that the correlation measured in the bin at minimal  $\tau$  is a more  
 236 accurate approximation of  $H^2$  than the correlation in bins at bigger  $\tau$  or the correlation of all PPs, we  
 237 refine the PP-method by imposing a limit on  $\tau$  and define closest phylogenetic pairs (CPP) as PPs that  
 238 are not farther apart than a cut-off distance  $\tau'$ . We tune this parameter based on the trade-off that arises  
 239 between the negative bias caused by  $\tau$  and the loss of statistical power caused by omitting data. Further  
 240 in the text, we refer to this variant of the PP method as **ANOVA-CPP** with estimate  $r_{A,\tau'}$ . The main  
 241 drawback of this filtering technique is its reduced statistical power due to fewer observations.

242 *The phylogenetic Ornstein-Uhlenbeck mixed model.* The phylogenetic Ornstein-Uhlenbeck mixed model  
 243 (POUMM) is an extension of the PMM replacing the BM assumption with an assumption of an Ornstein-  
 244 Uhlenbeck (OU) process for the genotype evolution (Mitov and Stadler, 2017). The OU-process represents  
 245 a continuous time random walk, which tends to move around a long-term mean value with greater  
 246 attraction when the process is further away from that value (Uhlenbeck and Ornstein, 1930). Technically,  
 247 this is accomplished by adding an attraction term to eq. 1:

$$dg(t) = \underbrace{\alpha[\theta - g(t)]dt}_{\text{Attraction to } \theta} + \underbrace{\sigma dW_t}_{\text{Brownian motion}}, \quad (4)$$

248 where  $\theta$  denotes the long-term mean and  $\alpha > 0$  is the attraction strength. Since in the limit  $\alpha \rightarrow 0$  the  
 249 attraction term vanishes and only the BM term remains, the OU-process represents a generalization of  
 250 BM. As in the PMM, a white noise is added to  $g(t)$  at the tips. POUMM estimates the parameters of  
 251 the stochastic model and the white noise, and then evaluates the phylogenetic heritability as a function  
 252 of  $\bar{t}$ :

$$H_{OU}^2 = \frac{\sigma^2(1 - e^{-2\alpha\bar{t}})}{\sigma^2(1 - e^{-2\alpha\bar{t}}) + 2\alpha\sigma_e^2}, \quad (5)$$

253 or as a time-independent function of the trait’s sample variance,  $s^2(z)$  (Mitov and Stadler, 2017):

$$H_e^2 = 1 - \sigma_e^2/s^2(z). \quad (6)$$

254 Further in the text, we use the symbols  $H_{BMe}^2$  and  $H_{OUe}^2$  to denote the time-independent heritability (eq.  
 255 6) inferred respectively by PMM and POUMM.

256 The POUMM provides an interesting alternative to the PMM, since, under this model, the expectation  
 257 for the covariance between trait-values for a couple of tips ( $ij$ ) is a function of both, their root-mrca  
 258 distance,  $t_{ij}$ , and their phylogenetic distance  $\tau_{ij}$ :

$$\Sigma_{OU,(ij)} = \exp(-\alpha\tau_{ij})[1 - \exp(-2\alpha t_{ij})] \frac{\sigma^2}{2\alpha}. \quad (7)$$

259 As it turns out, data simulated under the maximum likelihood fit of the POUMM method reproduces the  
 260 loss of resemblance between PPs in the UK HIV data (green points and vertical bars on fig. 2). Plotting  
 261 the correlation between tips in the tree as expected by the OU-process (substituting  $\bar{t}$  for  $t_{ij}$  in eq. 7  
 262 and normalizing by  $s^2(z)$ ; green line on fig. 2) reveals that the correlation between transmission-related  
 263 patients decreases approximately exponentially with rate-constant equal to to the parameter  $\alpha$  of the  
 264 OU process, ML estimate  $\alpha = 36.3$ , 95% CI [22.6, 62.4].

265 **A toy-model of an epidemic**

266 To test different estimators of heritability, we implement a phenomenological model of an epidemic, in  
 267 which an imaginary pathogen trait,  $z$ , is determined by the interaction between the alleles at a finite

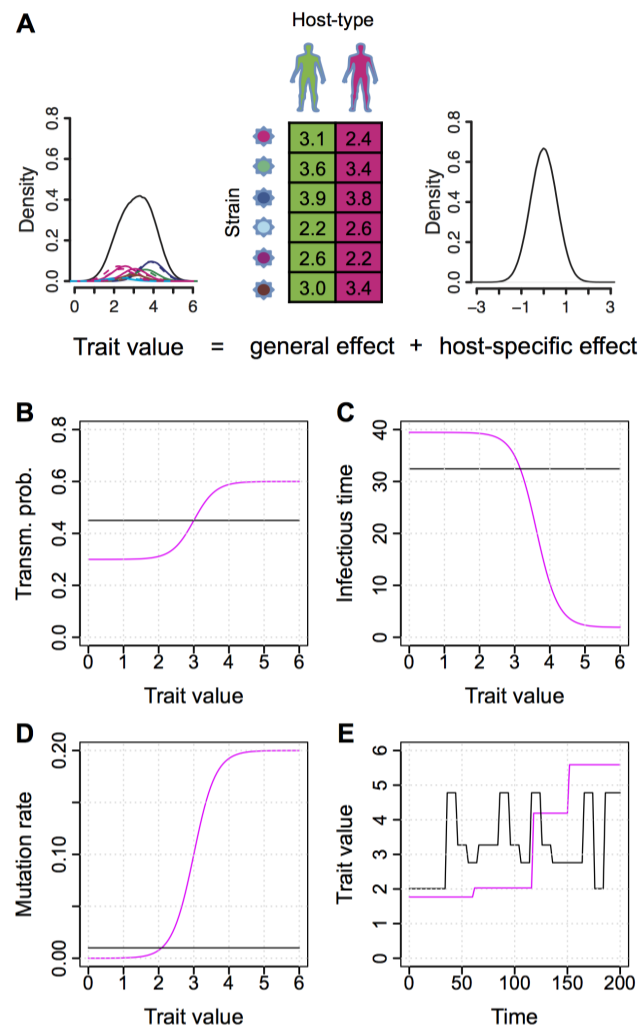

**FIG. 3. A toy model of a pathogen trait with within-host evolution and SIR dynamics.** (A) Schematic representation of a pathogen trait formed from a general  $i$ host type  $\times$  carried strain $_i$  effect and a host-specific effect. The density of the trait-values in an infected population represents a mixture of normal densities corresponding to each one of twelve host type  $\times$  strain combinations, scaled by their frequencies (dashed-lines depict host type 2); (B-E) SIR dynamics, color indicating selection modes with respect to to the trait-value, black: neutral, magenta: select (as specified in table 1); (B) Per risky contact transmission probability; (C) Expected infectious period if no mutation happens; (D) mutation rate (in mutations per site per time unit); (E) Example time-course of the trait evolution within a host; Time and trait-value units are arbitrary.

268 number of loci in the pathogen genotype and a finite number of immune system types encountered in  
 269 the susceptible population. This toy-model is embedded into a stochastic Susceptible-Infected-Recovered  
 270 (SIR) epidemic model (Keeling and Rohani, 2007), implementing “neutral” and “selection” modes of  
 271 within- and between-host dynamics. With the aid of figure 3, we briefly describe this model, leaving the  
 272 technical details for the section Materials and Methods.

273 We assume two equally frequent and lifelong immutable types of host immune system and two mutable  
 274 trait-determining loci in the pathogen genotype. With  $M_1=3$  and  $M_2=2$  possible alleles at each locus,  
 275 there are six possible genotypes denoted 1:11, 2:12, 3:21, 4:22, 5:31, 6:32 (fig. 3A). We assume absence  
 276 of strain coexistence within a host, so that the within-host quasispecies is represented by a single strain.  
 277 At a time  $t$ , the value  $z_i(t)$  of an infected individual  $i$  is defined as a function of its immune system

278 type,  $\mathbf{y}_i \in \{1, 2\}$ , the currently carried strain  $\mathbf{x}_i(t) \in \{1, \dots, 6\}$ , and the individual’s specific effect for this  
 279 strain  $e_i[\mathbf{x}_i(t)] \sim \mathcal{N}(0, 0.36)$  drawn at random for each strain (in each infected individual). We call a (type  
 280  $\mathbf{y}$ - $\mathbf{x}$ ) **general effect** the expected trait value of type- $\mathbf{y}$  carriers of strain  $\mathbf{x}$  in an infected population:  
 281  $GE[\mathbf{y}, \mathbf{x}] = E[z|\mathbf{y}, \mathbf{x}]$ . For a set of fixed general effects,  $z_i(t)$  is constructed according to the equation:

$$z_i(t) = GE[\mathbf{y}_i, \mathbf{x}_i(t)] + e_i[\mathbf{x}_i(t)] \quad (8)$$

282 We use a fixed set of general effects drawn from the uniform distribution  $\mathcal{U}(2, 4)$  for the twelve  $\mathbf{y}$ - $\mathbf{x}$   
 283 combinations (fig. 3A).

284 We embed this trait-model into a stochastic Susceptible-Infected-Recovered (SIR) model of an epidemic  
 285 with demography and frequency dependent transmission as described in (Keeling and Rohani, 2007),  
 286 ch. 1. Each infected individual,  $i$ , has a variable trait value  $z_i(t)$  constructed as in eq. 8. Within-host  
 287 phenomena (strain mutation and substitution) and between-host phenomena (natural birth, contact,  
 288 transmission, diagnosis, recovery and death) occur at random according to Poisson processes. The rate  
 289 parameters defining these processes are written in table 1.

290  
 291 For each group of parameters (within- and between-host), we consider the following two modes of  
 292 dynamics:

- 293 • neutral: rates are defined as global constants mimicking neutrality (i.e. lack of selection) with respect to  
 294  $z$  (black lines on fig. 3B-D). For within-host phenomena, it is assumed that a mutation of the pathogen  
 295 is followed by instantaneous substitution of the mutant for the current dominant strain, regardless of  
 296 the induced change in  $z$  (black line on fig. 3E);
- 297 • select: borrowing the approach from (Fraser *et al.*, 2007), the rates of transmission and within-host  
 298 pathogen mutation are defined as increasing Hill functions of  $10^z$ , while the infected death rate is  
 299 defined as an inverse decreasing Hill function of  $10^z$ , thus mimicking increasing per capita transmission-  
 300 and pathogen-induced mortality for higher  $z$  (red lines on fig. 3B-D). Within hosts, it is assumed that  
 301 a mutation of the pathogen is followed by instantaneous substitution only if it resulted in a higher  $z$ .  
 302 Otherwise, the mutation is considered deleterious (red line on fig. 3E).

303 By combining “neutral” and “select” dynamics for the strain mutation and substitution rates at the  
 304 within-host level, and the virus-induced per capita death rate and per contact transmission probability  
 305 at the between-host level, we define the following four scenarios (fig. 4):

- 306 • Within: neutral / Between: neutral;

**Table 1.** Within- and between-host dynamics of the toy epidemiological model.

| Scope                                          | Parameter                                                                                                                                                                                                                         | neutral                                                                                                                                                                                                           | select                                                                                                                                                                                                                                                         |
|------------------------------------------------|-----------------------------------------------------------------------------------------------------------------------------------------------------------------------------------------------------------------------------------|-------------------------------------------------------------------------------------------------------------------------------------------------------------------------------------------------------------------|----------------------------------------------------------------------------------------------------------------------------------------------------------------------------------------------------------------------------------------------------------------|
| Between-host                                   | Natural birth rate                                                                                                                                                                                                                | $\lambda_{\text{nat}} = 117.6$                                                                                                                                                                                    |                                                                                                                                                                                                                                                                |
|                                                | Natural per capita death rate                                                                                                                                                                                                     | $\delta_{\text{nat}} = 1/850$                                                                                                                                                                                     |                                                                                                                                                                                                                                                                |
|                                                | Per capita recovery rate                                                                                                                                                                                                          | $\rho = 1/48$                                                                                                                                                                                                     |                                                                                                                                                                                                                                                                |
|                                                | Per capita contact rate                                                                                                                                                                                                           | $\kappa \in \{\frac{1}{2}, \frac{1}{4}, \frac{1}{6}, \frac{1}{8}, \frac{1}{10}, \frac{1}{12}\}$                                                                                                                   |                                                                                                                                                                                                                                                                |
|                                                | Per capita risky contact rate (S: current proportion of susceptible in the pop.)                                                                                                                                                  | $S \times \kappa$                                                                                                                                                                                                 |                                                                                                                                                                                                                                                                |
|                                                | Per risky contact transmission probability                                                                                                                                                                                        | $\gamma_{\text{neutral}} = .45$                                                                                                                                                                                   | $\gamma(z) = \gamma_{\text{min}} + \frac{(\gamma_{\text{max}} - \gamma_{\text{min}})(\gamma_{50})^{\gamma_k}}{10^{z \gamma_k} + (\gamma_{50})^{\gamma_k}}$ , where<br>$\gamma_{\text{min}} = .3, \gamma_{\text{max}} = .6, \gamma_{50} = 10^3, \gamma_k = 1.4$ |
| Per capita death rate for infected individuals | $\delta_{\text{neutral}} = .01$                                                                                                                                                                                                   | $\delta(z) = \delta_{\text{nat}} + \frac{10^{z D_k} + (D_{50})^{D_k}}{D_{\text{min}} 10^{z D_k} + D_{\text{max}} (D_{50})^{D_k}}$ , where<br>$D_{\text{min}} = 2, D_{\text{max}} = 300, D_{50} = 10^3, D_k = 1.4$ |                                                                                                                                                                                                                                                                |
| Within-host                                    | Per locus pathogen mutation rate                                                                                                                                                                                                  | $\nu_{\text{neutral}} = .01$                                                                                                                                                                                      | $\nu(z) = \frac{\nu_{\text{max}}(\nu_{50})10^{z \nu_k}}{10^{z \nu_k} + (\nu_{50})^{\nu_k}}$ , where $\nu_{\text{max}} = .2, \nu_{50} = 10^3, \nu_k = 1.4$                                                                                                      |
|                                                | Rate of substitution of strain $\mathbf{x}_j$ for $\mathbf{x}_i$ , where $\mathbf{x}_i \neq \mathbf{x}_j$ at a single locus, $l$ , $M_l$ is the number of alleles at locus $l$ , and the corresponding values are $z_i$ and $z_j$ | $\xi_l = \frac{\nu_{\text{neutral}}}{M_l - 1}$                                                                                                                                                                    | $\xi_{l,i \leftarrow j}(z_i, z_j) = \begin{cases} \frac{\nu(z_i)}{M_l - 1} & \text{if } \nu(z_i) < \nu(z_j) \\ 0 & \text{, otherwise} \end{cases}$                                                                                                             |

- 307 • Within: select / Between: neutral;
- 308 • Within: neutral / Between: select;
- 309 • Within: select / Between: select;

310 For each of these scenarios and mean contact interval  $1/\kappa \in \{2, 4, 6, 8, 10, 12\}$  (arbitrary time units), we  
 311 perform ten simulations resulting in a total of  $4 \times 6 \times 10 = 240$  simulations. In the next section, we discuss  
 312 the resulting heritability estimates from these simulations and from a real dataset.

## 313 Results

### 314 Simulations

315 Of 240 toy-model simulations, 175 resulted in epidemic outbreaks of at least 1,000 diagnosed individuals.  
 316 In each of these 175 simulations, we analyzed the population of the first up to 10,000 diagnosed  
 317 individuals. We denote this population by  $Z_{10k}$  and the corresponding transmission tree – by  $T_{10k}$ .

318 The direct measure of broad-sense heritability,  $R_{adj}^2$ , was compared to the following estimators:  $b_0$  in  
319 all transmission couples found in  $Z_{10k}$ ;  $b_\tau$  in the same transmission couples;  $b_{D_1}$  in transmission couples  
320 in  $Z_{10k}$  having  $\tau$  not exceeding the first decile,  $D_1$ ;  $r_A[id]$  based on grouping by identity of carried strain  
321 in  $Z_{10k}$ ;  $r_{A,\tau}$  based on phylogenetic pairs (PPs) in  $T_{10k}$ ;  $r_{A,D_1}$  based on closest phylogenetic pairs (CPPs)  
322 defined as PPs in  $T_{10k}$  having  $\tau$  not exceeding the first decile,  $D_1$ , among all PPs;  $H_{BM}^2$  and  $H_{OUe}^2$  based  
323 on the maximum likelihood (ML) fit of the PMM and POUMM methods on  $T_{10k}$ . To calculate  $b_0$ , we  
324 used the immediate trait-values at moments of transmission (usually not available in practice). All other  
325 estimators were calculated using trait-values at the moment of diagnosis.

326 A detailed analysis of the different heritability estimates (table 2, fig. 4, Supplementary Notes,  
327 supplementary figs. S1, S2, S3) confirmed the negative bias due to measurement delays in the resemblance-  
328 based estimators  $b_\tau$  and  $r_{A,\tau}$ . This bias was increasing with the mean contact interval,  $1/\kappa$ , because, for  
329 a fixed recovery rate  $\rho$ , rarer transmission events resulted in longer transmission trees and, therefore,  
330 longer average phylogenetic distance between tips,  $\tau$ , (fig. S3). The negative bias was far less pronounced  
331 when imposing a threshold on  $\tau$ , but this came at the cost of statistical power (more accurate but longer  
332 box-whisker plots for  $b_{D_1}$  and  $r_{A,D_1}$  compared to  $b_\tau$  and  $r_{A,\tau}$ , fig. 4). Further, the simulations showed  
333 that a worsening fit of the BM model on longer transmission trees caused an inflated estimate of the  
334 environmental variance,  $\sigma_e^2$ , in the PMM method and, therefore, a negative bias in  $H_{BM}^2$  and  $H_{BMe}^2$ . As  
335 explained in the previous section, this is caused by the inability of the BM assumption to model the loss of  
336 phenotypic resemblance with increasing phylogenetic distance between tips. Several other sources of bias,  
337 such as non-linear dependence of recipient on donor-values and deviation from normality were identified  
338 and are summarized in table 3. We conclude that, apart from the practically inaccessible immediate  
339 donor-recipient regression ( $b_0$ ) and ICC of patients grouped by identity of carried strain ( $r_A[id]$ ), the  
340 most accurate estimator of  $H^2$  in the toy-model simulations is  $H_{OUe}^2$  followed by estimators minimizing  
341 measurement delays such as  $b_{D_1}$  and  $r_{A,D_1}$ .

#### 342 Analysis of HIV-data

343 We performed ANOVA-CPP and POUMM on data from the UK HIV cohort comprising  $\lg(\text{spVL})$   
344 measurements and a tree of viral (pol) sequences from 8,483 patients inferred previously in (Hodcroft  
345 *et al.*, 2014). The goal was to test our conclusions on a real dataset and compare the  $H^2$ -estimates from  
346 ANOVA-CPP and POUMM to previous PMM/ReML-estimates on exactly the same data (Hodcroft  
347 *et al.*, 2014). A scatter plot of the phylogenetic distances of tip-pairs against the absolute phenotypic  
348 differences,  $|\Delta \lg(\text{spVL})|$ , reveals a small set of 116 PPs having  $\tau \leq 10^{-4}$  while the phylogenetic distance

**Table 2. Mean difference  $\widehat{H^2} - H^2$  from the toy-model simulations grouped by scenario.** Statistical significance is estimated by Student’s t-tests, p-values denoted by an asterisk as follows: \*  $p < 0.01$ ; \*\*  $p < 0.001$ . The column # denotes the number of simulations resulting in an epidemic outbreak under each scenario. Grey background indicates estimates that are unavailable in practice. Estimates of  $H_{OU}^2$  are not shown since they match with  $H_{OUe}^2$ .

| Within/Between  | #  | $b_0$   | $b_{D_1}$ | $b_\tau$ | $r_A[id]$ | $r_{A,D_1}$ | $r_{A,\tau}$ | $H_{BM}^2$ | $H_{BMe}^2$ | $H_{OUe}^2$ |
|-----------------|----|---------|-----------|----------|-----------|-------------|--------------|------------|-------------|-------------|
| neutral/neutral | 50 | -0.01*  | -0.07**   | -0.25**  | 0.05**    | -0.05**     | -0.18**      | -0.17**    | -0.28**     | -0.01       |
| select/neutral  | 47 | 0.05**  | 0         | -0.07**  | 0.08**    | 0           | -0.06**      | -0.01      | -0.12**     | 0.01*       |
| neutral/select  | 41 | -0.02** | -0.04**   | -0.2**   | 0.05**    | -0.06**     | -0.15**      | -0.17**    | -0.24**     | -0.02**     |
| select/select   | 37 | 0.04**  | -0.01     | -0.06**  | 0.06**    | -0.03*      | -0.08**      | -0.04*     | -0.16**     | 0.03**      |

349 in all remaining tip-pairs is more than an order of magnitude longer, i.e.  $\tau > 10^{-3}$  (fig. 5A). A box-  
 350 plot graph of the trait-values along the tree shows that the range of trait-values is confined between 1  
 351 and 7 with relatively stable median and interquartile range (IQR) throughout the epidemic (fig. 5B).  
 352 This visual analysis of the data suggests that the distribution of trait values has been at equilibrium  
 353 during the time period covered by the transmission tree. The random distribution of the CPPs along  
 354 the transmission tree suggests that these phylogenetic pairs correspond to randomly occurring early  
 355 detections of infection (trait-values from each pair depicted as magenta segments on fig. 5B). Based on  
 356 the observed gap of  $\tau$ , we defined these PPs as closest ones (CPP). We applied the  $1.5 \times IQR$ -rule on  
 357  $|\Delta \lg(\text{spVL})|$  to identify outliers among the CPPs. According to this rule, outliers are all CPPs having  
 358 absolute phenotypic difference below  $Q_1 - 1.5 \times IQR$  or above  $Q_3 + 1.5 \times IQR$ ,  $Q_1$ , where  $Q_3$  denotes the  
 359 25<sup>th</sup> and 75<sup>th</sup> quantile of  $|\Delta \lg(\text{spVL})|$  in CPPs and IQR denotes the interquartile range  $Q_3 - Q_1$ . The  
 360 outlier CPPs defined in that way are shown as blue bullets on fig. 5.

361 We compared the following estimators of  $H^2$ , with and without inclusion of outlier CPPs in the data:

- 362 • ANOVA on CPPs/PPs;
- 363 • POUMM/PMM on the whole tree (including tips belonging to CPPs);
- 364 • POUMM/PMM on the tree obtained after dropping tips belonging to CPPs;

365 The results from these analyses are written in table 4. Excluding outlier CPPs, ANOVA-CPP (222  
 366 patients) reported  $\lg(\text{spVL})$ -heritability estimates of 0.31, 95% CI [0.19, 0.43]. POUMM (8,473 patients)  
 367 reported agreeing estimates of 0.25, 95% CI [0.16, 0.36] and 0.22, CI [0.13, 0.35] upon omitting all  
 368 222 patients belonging to CPPs. The slightly lower POUMM estimates could be explained by errors in  
 369 the transmission tree, which are not present in CPPs. These results show first, that ANOVA-CPP and  
 370 POUMM agree on disjoint subsets of the UK data and, second, that POUMM provides an alternative  
 371 to resemblance-based methods in the absence of early-diagnosed cases.



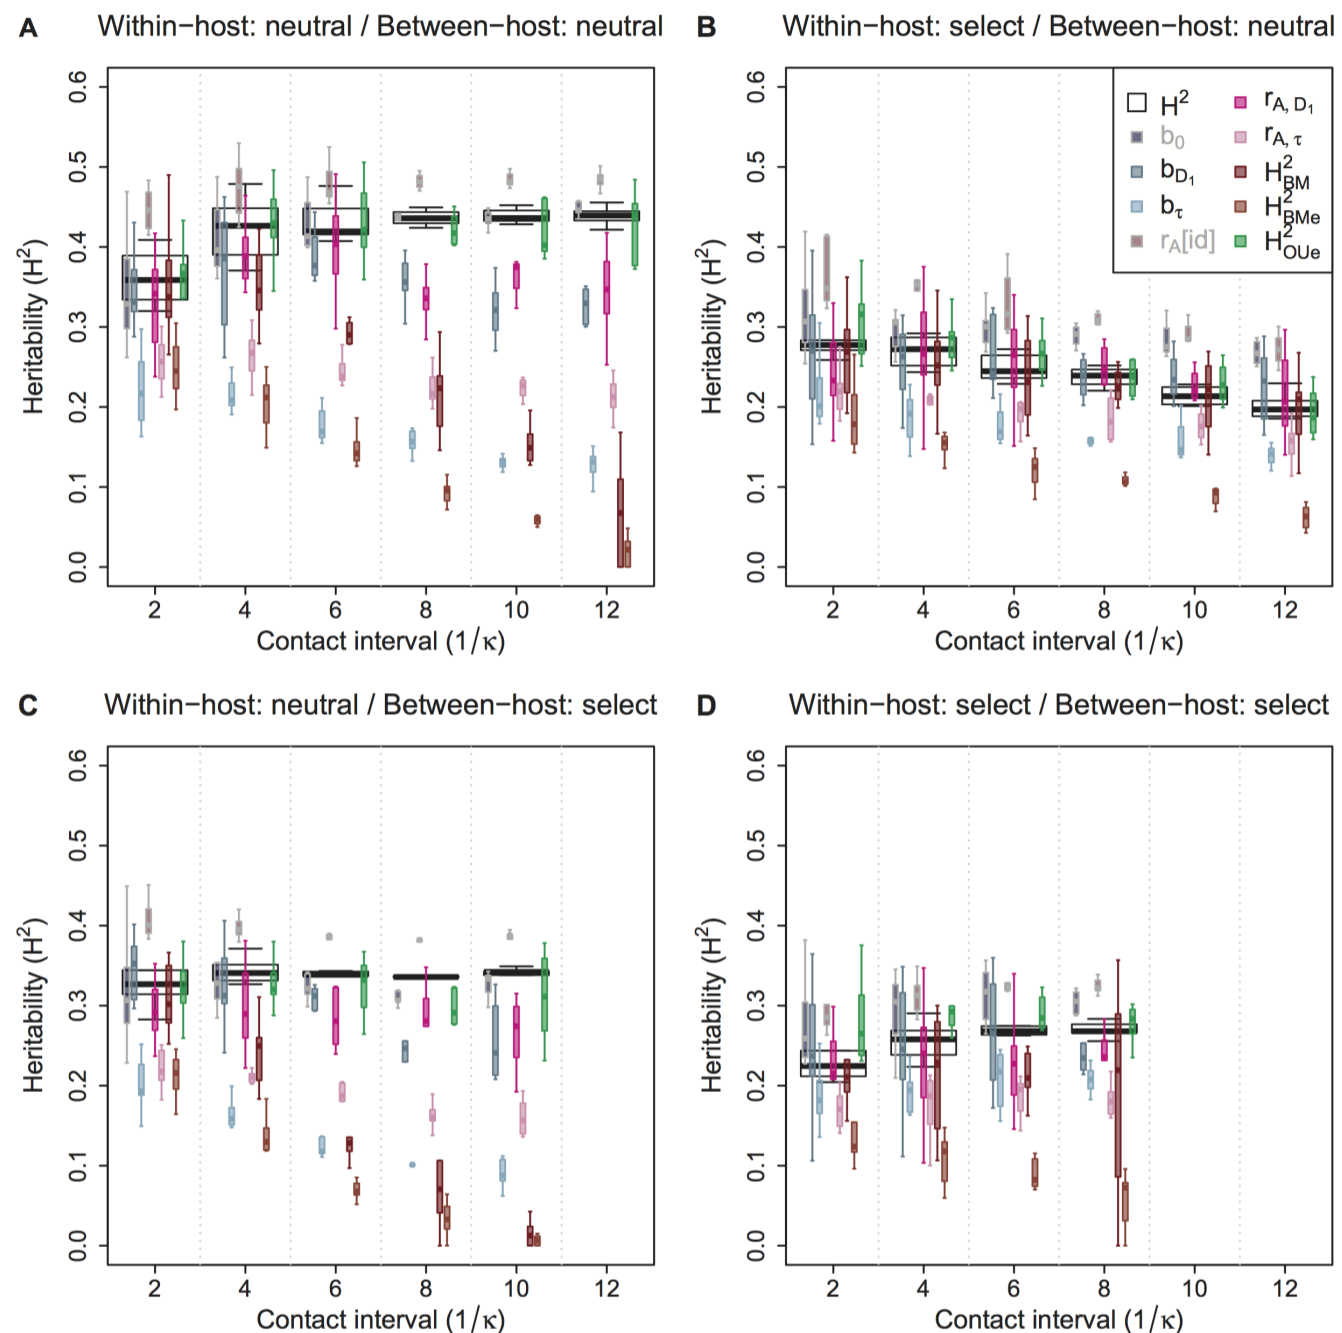

**FIG. 4. Heritability estimates from computer simulations of the toy-model.** (A-D)  $H^2$ -estimates in simulations of “neutral” and “select” within-/between-host dynamics. Each box-group summarizes simulations (first up to 10,000 diagnoses) at a fixed contact rate,  $\kappa$ ; white boxes (background) denote true heritability, colored boxes denote estimates (foreground). Estimates that are not measurable in practice are shaded in grey. Statistical significance is evaluated through t-tests summarized in table 2. For an in-depth analysis of bias for fixed contact-rate  $\kappa$ , see Supplementary Notes, supplementary figs. S1 and S2. Estimates of  $H_{OU}^2$  are not shown since they match with  $H_{OUe}^2$ .

372 Figure 6 compares these estimates to previous lg(spVL) studies using phylogenetic and known  
 373 transmission-pairs data. In agreement with the toy-model simulations, estimates of  $H^2$  using PMM or  
 374 other phylogenetic methods (i.e. Blomberg’s  $K$  and Pagel’s  $\lambda$ ) are notably lower than all other estimates,  
 375 suggesting that these phylogenetic comparative methods underestimate  $H^2$ ; resemblance-based estimates  
 376 are down-biased by measurement delays (compare early vs late on fig. 6).

**Table 3. Sources of bias in estimators of  $H^2$ .** The bias direction is indicated by a “+” or a “-”, separated by a “/” when both directions are possible. The number of signs indicates the relative intensity of the bias that is observed in the simulations or in the analysis of the HIV data. A zero indicates no bias observed. A “?” indicates unknown direction. Horizontal lines separate sources that were identified in the SIR simulations (top) from sources identified in the analysis of the HIV data (middle) and sources suggested by this or previous works that were not tested (bottom). Grey background denotes estimators not available in practice.

| Source of bias                                                  | $b_0$ | $b_{D_1}$ | $b_\tau$ | $r_A[id]$ | $r_{A,D_1}$ | $r_{A,\tau}$ | $H_{BM}^2$ | $H_{BMe}^2$ | $H_{OU}^2$ | $H_{OUe}^2$ |
|-----------------------------------------------------------------|-------|-----------|----------|-----------|-------------|--------------|------------|-------------|------------|-------------|
| Gradual within-host evolution                                   | 0     | -         | --       | 0         | -           | --           | 0          | 0           | 0          | 0           |
| Violation of assumed model (i.e. BM)                            | 0     | 0         | 0        | 0         | 0           | 0            | +/-        | +/-         | +/-        | +/-         |
| Nonlinear dependence of expected recipient value on donor value | +/-   | +/-       | +/-      | 0         | 0           | 0            | 0          | 0           | 0          | 0           |
| Non-normality of $z$                                            | +/-   | +/-       | +/-      | +/-       | +/-         | +/-          | +/-        | +/-         | +/-        | +/-         |
| Loss of phylogenetic signal due to scarce transmission tree     | 0     | 0         | 0        | 0         | 0           | 0            | +/-        | +/-         | +/-        | +/-         |
| Outliers in $z$                                                 | +/-   | +/-       | +/-      | +/-       | +/-         | +/-          | +/-        | +/-         | +/-        | +/-         |
| Partial quasi-species transmission                              | -     | -         | -        | 0         | -           | -            | -          | -           | -          | -           |
| Temporal changes in the trait distribution                      | +/-   | +/-       | +/-      | +/-       | +/-         | +/-          | +/-        | +/-         | +/-        | +/-         |
| Outlying tips in the tree                                       | 0     | 0         | 0        | +/-       | +/-         | +/-          | +/-        | +/-         | +/-        | +/-         |
| Non-homogeneous evolutionary process                            | 0     | 0         | 0        | 0         | -           | -            | +/-        | +/-         | +/-        | +/-         |
| Random error in transmission tree                               | 0     | 0         | 0        | 0         | 0           | 0            | -          | -           | -          | -           |
| Biases in the transmission tree                                 | 0     | 0         | 0        | 0         | ?           | ?            | ?          | ?           | ?          | ?           |

377 In summary, POUMM and ANOVA-CPP yield agreeing estimates for  $H^2$  in the UK data and these  
 378 estimates agree with DR-based estimates in datasets with short measurement delay (different African  
 379 countries and the Netherlands). Similar to the toy-model simulations, we notice a well-pronounced pattern

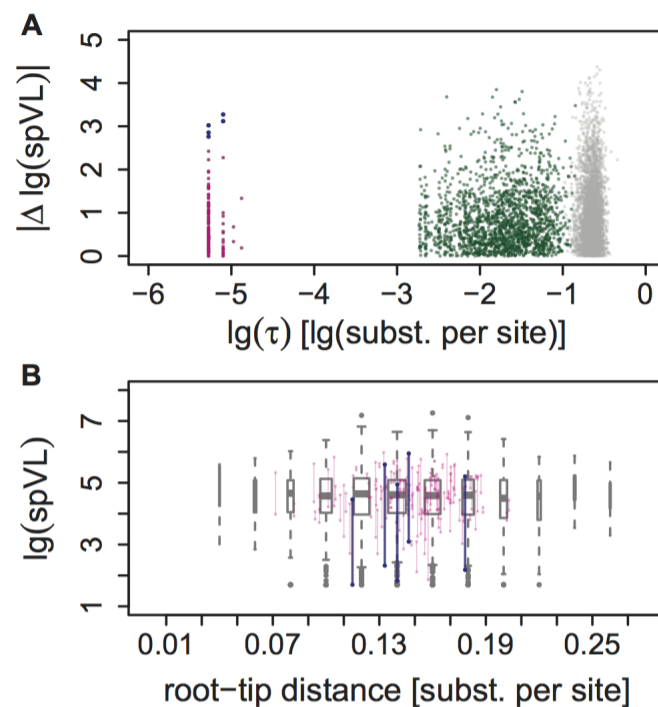

**FIG. 5. Analysis of HIV-data from UK.** (A) A scatter plot of the phylogenetic distances between pairs of tips against their absolute phenotypic differences: grey – random pairs; green – PPs ( $\tau > 10^{-4}$ ); magenta: CPPs ( $\tau \leq 10^{-4}$ ); blue – outlier

CPPs (CPPs, for which  $|\Delta \lg(\text{spVL})| > Q_3 + 1.5 \times (Q_3 - Q_1)$ ,  $Q_1$  and  $Q_3$  denoting the 25<sup>th</sup> and 75<sup>th</sup> quantile of  $|\Delta \lg(\text{spVL})|$  among CPPs); (B) A box-plot representing the trait-distribution along the transmission tree. Each box-whisker represents the  $\lg(\text{spVL})$ -distribution of patients grouped by their distance from the root of the tree measured in substitutions per site. Wider boxes indicate groups bigger in size. Bullet-ending segments denote  $\lg(\text{spVL})$ -values in CPPs.

**Table 4. ANOVA-CPP and POUMM estimates of  $\lg\text{spVL}$ -heritability in HIV data from UK.** Also written are the results from a previous analysis on the same dataset (Hodcroft et al. 2014). “=”: the input data (and MCMC prior) is not altered by filtering out outlier CPPs; “-”: the analysis was not done in the mentioned study. Grey background: estimates considered unreliable due to: a: negative bias caused measurement delays; b: negative bias caused by BM violation; c: presence of outlier CPPs;

| Method                                                 | All tips in the phylogeny |                     |                             | Without outlier CPPs |                   |                           |
|--------------------------------------------------------|---------------------------|---------------------|-----------------------------|----------------------|-------------------|---------------------------|
|                                                        | $N$                       | $\hat{H}^2$         | 95% CI                      | $N$                  | $\hat{H}^2$       | 95% CI                    |
| ANOVA-CPP ( $r_{A,10^{-4}}$ )                          | 232 <sup>c</sup>          | 0.16 <sup>c</sup>   | [0.01, 0.30] <sup>c</sup>   | 222                  | 0.31              | [0.19, 0.43]              |
| ANOVA-PP ( $r_{A,\tau}$ ) <sup>a</sup>                 | 3834 <sup>a,c</sup>       | 0.11 <sup>a,c</sup> | [0.07, 0.14] <sup>a,c</sup> | 3824 <sup>a</sup>    | 0.11 <sup>a</sup> | [0.08, 0.14] <sup>a</sup> |
| POUMM ( $H_{OUe}^2$ )                                  | 8483 <sup>c</sup>         | 0.20 <sup>c</sup>   | [0.13, 0.28] <sup>c</sup>   | 8473                 | 0.25              | [0.16, 0.36]              |
| POUMM, no CPP ( $H_{OUe}^2$ ; $\tau > 10^{-4}$ )       | 8251                      | 0.22                | [0.13, 0.35]                | =                    | =                 | =                         |
| PMM ( $H_{BMe}^2$ ) <sup>b</sup>                       | 8483 <sup>b,c</sup>       | 0.06 <sup>b,c</sup> | [0.02, 0.09] <sup>b,c</sup> | 8473 <sup>b</sup>    | 0.06 <sup>b</sup> | [0.02, 0.10] <sup>b</sup> |
| PMM, ReML (Hodcroft <i>et al.</i> , 2014) <sup>b</sup> | 8483 <sup>b,c</sup>       | 0.06 <sup>b,c</sup> | [0.03, 0.09] <sup>b,c</sup> | –                    | –                 | –                         |

380 of negative bias for the other estimators, PMM and ANOVA-PP, as well as for the previous DR-studies  
 381 on data with long measurement delay.

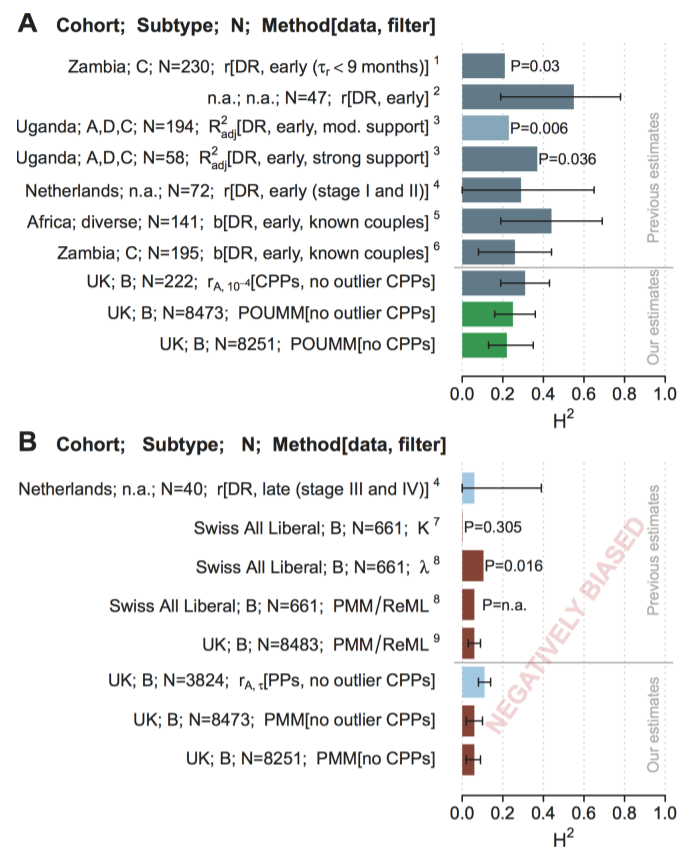

**FIG. 6. A comparison between  $H^2$ -estimates from the UK HIV-cohort and previous estimates on African, Swiss and Dutch data.** (A) Estimates with minimized measurement delay (dark cadet-blue) and POUMM estimates (green); (B) Down-biased estimates due to higher measurement delays (light-blue) or violated BM-assumption (brown). Confidence is depicted either as segments indicating estimated 95% CI or P-values in cases of missing 95% CIs. References to the corresponding publications are written as numbers in superscript as follows: 1: Tang et al. 2004; 2: Hecht et al. 2010; 3: Hollingsworth et al. 2010; 4: Van der Kuyl et al. 2010; 5: Lingappa et al. 2013; 6: Yue et al. 2013; 7: Alizon et al. 2010; 8: Shirreff et al. 2013; 9: Hodcroft et al. 2014. For clarity, the figure does not include estimates from the UK data including the five outlier CPPs (table 4) and estimates from previous studies, which are not directly comparable (e.g. previous results from Swiss MSM/strict datasets (Alizon *et al.*, 2010)).

## 382 Discussion

383 Clarifying the terminology and notation

384 The first task of this study was the transfer of quantitative genetics terminology to the domain of pathogen  
 385 traits. Due to important lifecycle differences between pathogens and mating organisms, it is essential to  
 386 disentangle the concepts of relative resemblance and genetic determination. In essence, the estimators  
 387 of trait resemblance between transmission-related patients, such as DR and ICC, and the phylogenetic  
 388 heritability, must be regarded as lower bounds for the broad-sense heritability,  $H^2$ , compromised by  
 389 partial quasispecies transmission, within-host evolution and various violations of model assumptions  
 390 (table 3). A few examples from recent studies of HIV demonstrate the need for a careful consideration of  
 391 these concepts. For example, in (Hodcroft *et al.*, 2014) and (Leventhal and Bonhoeffer, 2016) the authors  
 392 introduce the PMM/ReML and the DR methods for estimating heritability after a definition of the narrow  
 393 sense heritability,  $h^2$ . This can leave a confusing impression that the reported values are estimates of  $h^2$   
 394 rather than  $H^2$ , because these methods are popular for estimating narrow-sense heritability for sexual

395 species. As another example, in (Fraser *et al.*, 2014; Shirreff *et al.*, 2013), the authors use the lower-case  
396 notation “ $h^2$ ” to denote estimates of  $H^2$ . In fact, there are historical reasons to associate the symbol “ $h^2$ ”  
397 with the regression slope,  $b$  (Fraser *et al.*, 2014; Wright, 1934). However, “ $h^2$ ” is the standard symbol for  
398 narrow-sense heritability and  $b$  is, most of all, a measure of phenotypic resemblance. To avoid confusion,  
399 we recommend using the standard symbol “ $H^2$ ” for broad-sense heritability (Hartyl and Clark, 2007;  
400 Lynch and Walsh, 1998) and different symbols for its indirect estimators.

#### 401 A disagreement between simulation studies

402 Using simulations of a phenomenological epidemiological model, we have shown that two methods  
403 based on phenotypic and sequence data from patients - ANOVA-CPP and POUMM - provide more  
404 accurate heritability estimates compared to previous approaches like DR and PMM. However, we should  
405 not neglect the arising discrepancy between our and previous simulation reports advocating either  
406 PMM (Hodcroft *et al.*, 2014) or DR (Leventhal and Bonhoeffer, 2016) as unbiased heritability estimators.  
407 Compared to these simulations, the toy-model presented here has several important advantages: (i) it is  
408 biologically motivated by phenomena such as pathogen mutation during infection, transmission of entire  
409 pathogens instead of proportions of trait values, and within-/between-host selection; (ii) it is a fair test  
410 for all estimators of heritability, because it doesn’t obey any of the estimators’ assumptions, such as  
411 linearity of recipient- on donor values, normality of trait values, OU or BM evolution, independence  
412 between pathogen and host effects; (iii) it generates transmission trees that reflect the between-host  
413 dynamics, e.g. clades with higher trait-values exhibit denser branching in cases of between-host selection.  
414 As a criticism, we note that the toy-model does not allow strain coexistence within a host and, thus, is  
415 not able to model partial quasispecies transmission and, in particular, transmission bottlenecks (Keele  
416 *et al.*, 2008) or preferential transmission of founder strains (Lythgoe and Fraser, 2012). Although it may  
417 be exciting from a biological point of view, the inclusion of strain coexistence comes with a series of  
418 conceptual challenges, such as the definition of genotype and clonal identity, the formulation of the trait-  
419 value as a function of a quasispecies- instead of a single strain genotype, etc. These challenges should be  
420 addressed in future studies implementing more advanced models of within-host dynamics and leveraging  
421 deep sequencing data. To conclude, the discrepancy between simulation studies teaches that no method  
422 suits all simulation setups *ergo* biological contexts. Thus, rather than proving universality of a particular  
423 method, simulations should be used primarily to study how particular biologically relevant features affect  
424 the methods on table.

425 The heritability of HIV set-point viral load is at least 25%.

426 Applied to data from the UK, ANOVA-CPP and POUMM reported four to five times higher point  
427 estimates and non-overlapping CIs compared to a previous PMM/ReML-based estimate on the same data  
428 (0.06, 95% CI [0.02, 0.09]) (Hodcroft *et al.*, 2014). Our PMM implementation confirmed this estimate.  
429 However, based on our simulations (fig. 2 and fig. 4), these estimates are still underestimates of the true  
430 heritability. Overall, our analyses yield an unprecedented agreement between estimates of donor-recipient  
431 resemblance and phylogenetic heritability in large European datasets and African cohorts, provided that  
432 measurements with large delays have been filtered out prior to resemblance evaluation (Hecht *et al.*,  
433 2010; Hollingsworth *et al.*, 2010) (fig. 6A). Also noteworthy is the fact that our estimates for the UK  
434 dataset support the results from Fraser *et al.* (2014) who conducted a meta-analysis of three datasets on  
435 known transmission partners (Hollingsworth *et al.*, 2010; Lingappa *et al.*, 2013; Yue *et al.*, 2013) (433  
436 pairs in total) reporting heritability values of 0.33, CI [0.20,0.46]. All datasets support the hypothesis of  
437 HIV influencing spVL ( $H^2 > 0.25$ ). The particular estimates provided here should be interpreted as lower  
438 bounds for  $H^2$ , because the partial quasispecies transmission, the noises in spVL measurements and  
439 the noise in transmission trees are included implicitly as environmental (non-transmittable) effects. The  
440 non-zero heritability motivates further HIV whole-genome sequencing (Metzner, 2016) and genome-wide  
441 studies of the viral genetic association with viral load and virulence.

#### 442 A critical view on the POUMM

443 The OU process has found previous applications as a model for stabilizing selection in macro-evolutionary  
444 studies (Felsenstein, 1988; Hansen, 1997; Hansen and Bartoszek, 2012; LANDE, 1976) and references  
445 therein. As a contribution of this work, we have shown that the OU process is well adapted for the  
446 modeling of pathogen evolution along transmission trees in both, neutral as well as selection scenarios.  
447 Unlike BM, OU models the phenotypic resemblance between transmission related patients as a function  
448 of their phylogenetic distance, thus, capturing the gradual loss of resemblance caused by within-host  
449 evolution (fig. 2). Most of the above-mentioned studies and the accompanying software packages have  
450 assumed that the whole trait evolves according to an OU process, usually disregarding the presence of a  
451 biologically relevant non-heritable component  $e$  or treating it as a measurement error whose variance is  
452 a priori known (FitzJohn, 2012). Having the OU process act on the genotypic values rather than whole  
453 trait-values is a simplifying assumption facilitating mathematical processing (Mitov and Stadler, 2017).  
454 However, our toy model simulations have shown robustness and statistical power of the POUMM in  
455 complicated scenarios combining trait-based selection at the within- and between-host levels. Another  
456 criticism that can be addressed to the POUMM method is that it is unaware of between-host selection

457 and demographic processes, which may result in a correlation between tree structure and trait values (for  
458 example higher branching density in clades with higher  $z$ ). As noted by Leventhal and Bonhoeffer (2016),  
459 this is a general issue with phylogenetic comparative approaches assuming a global evolutionary process  
460 acting on the whole phylogeny. An unexplored alternative would be to associate different instances of  
461 POUMM to different clades in the tree based on prior knowledge about heterogeneity between these  
462 clades.

#### 463 Outlook

464 ANOVA-CPP and POUMM have great potential to become widely used tools in the study of pathogens.  
465 ANOVA-CPP works on pairs of trait values from carriers of nearly identical strains and can be easily  
466 extended to groups of variable size (Anderson *et al.*, 2010; Lynch and Walsh, 1998). Thus, ANOVA-CPP  
467 is ideal for slowly evolving pathogens such as DNA-viruses, bacteria and protozoa, where clusters of  
468 patients carrying identical-by-descent (IBD) strains are frequently found. For example, Anderson *et al.*  
469 2010 identified 27 clusters of two to eight carriers of IBD strains in a small set of 185 malaria patients, i.e.  
470 41% of the patients participated in clusters (Anderson *et al.*, 2010). On the other hand, IBD-pairs are rare  
471 for rapidly evolving RNA-viruses, such as HIV and HCV. For instance, we identified only 116 CPPs in a  
472 large dataset of 8483 HIV-sequences, i.e. less than 3% of the patients involved in IBD-pairs. However, the  
473 rapidly accumulating sequence diversity of RNA-viruses allows building large-scale phylogenies, which  
474 approximate transmission trees between patients. Thus, RNA-viruses should make the ideal scope for  
475 the POUMM. We believe that, together, the two methods should enable accurate and robust heritability  
476 estimation in a broad range of pathogens.

#### 477 **Materials and Methods**

##### 478 Formal definitions of heritability

479 Here, we briefly review the formal definitions of heritability in sexually reproducing populations based  
480 on the general linear model of quantitative traits (Falconer, 1996; Hartyl and Clark, 2007; Lynch and  
481 Walsh, 1998) and the three concepts introduced in the main text: the genetic determination of a trait,  
482 the resemblance between relatives, and the efficiency of selection.

##### 483 *The general linear model of a quantitative trait*

484 A principal goal of quantitative genetics is to partition the observed phenotypic variance in a population  
485 into components attributable to genetic and environmental factors. Fundamental for the study of the  
486 genetic and environmental sources of variance is the general linear model for the phenotype (see Lynch  
487 and Walsh (1998), ch. 6), in which, for a given trait of interest, the observed phenotypic value,  $z$ , of an  
488 organism is represented as a sum of effects of the organism's genes,  $G$ , general (macro-) environmental



489 effects,  $E$ , gene by (macro-) environment interaction,  $I$ , and special (micro-) environmental effects  $e$

$$z = G + I + E + e \quad (9)$$

490 It is assumed that the trait is influenced by a number of genes whose locations in the species' reference  
491 genetic sequence are called quantitative trait loci (QTL). In an individual, the configuration of alleles  
492 found at the trait's QTLs is called genotype and, for a population, the genotypic value,  $G_{\mathbf{x}}$ , of a genotype  
493  $\mathbf{x}$  is defined as the expected trait value of its carriers:  $G_{\mathbf{x}} = E(z | \text{genotype} = \mathbf{x})$ . The remaining terms in  
494 eq. 9 are “defined in a least-squares sense as deviations from lower order expectations” (Lynch and  
495 Walsh, 1998). It is worthy to note that  $G_{\mathbf{x}}$  depends on the distribution of  $\mathbf{x}$  across environments in the  
496 population and that, by construction, the residuals  $z - G = I + E + e$  have zero mean and are uncorrelated  
497 with  $G$  (Lynch and Walsh (1998), ch. 6). Thus, the total phenotypic variance observed in the population  
498 can be partitioned into a component that is purely genetic and a component that is attributable to  
499 both, non-genetic (purely environmental) factors as well as gene-by-environment interactions:  $\sigma^2(z) =$   
500  $\sigma^2(G) + \sigma^2(z - G)$ .

501 *Measuring the genetic determination of a trait*

502 **Heritability in the broad sense**, a.k.a. degree of genetic determination (Falconer, 1996), is defined as  
503 the ratio of the variance of genotypic values to total phenotypic variance in the population:

$$H^2 = \sigma^2(G) / \sigma^2(z) \quad (10)$$

504 A direct estimation of  $H^2$  would require that all QTLs were known and that for each genotype there  
505 was a sample of measurements from individuals who were: (i) genetically identical at the QTLs; (ii)  
506 raised in randomly and independently assigned environments; (iii) present in the final dataset according  
507 to the population-specific environment-genotype frequencies. Given such a dataset of  $N$  independent  
508 measurements from carriers of all  $K$  distinct genotypes in the population ( $K \ll N$ ),  $H^2$  can be estimated  
509 by the ratio of sample variances  $s^2(\hat{G}) / s^2(z)$ , where  $\hat{G}$  denotes the individuals' genotypic values estimated  
510 by the mean value of their corresponding group and  $s^2(\cdot)$  denotes sample variance. Though, intuitive,  
511 this formula is slightly positively biased in the case of finite sample size. Thus, we prefer its correction  
512 for finite degrees of freedom, a.k.a. as adjusted coefficient of determination:

$$R_{adj}^2 = 1 - \frac{N-1}{N-K} \frac{s^2(z - \hat{G})}{s^2(z)} \quad (11)$$

513 In the absence of full QTL information and data from independently grown clones, direct estimation of  
514  $H^2$  is rarely possible. Instead, quantitative geneticists focus on estimating its lower bound defined below.

515 **Heritability in the narrow sense** is defined as the ratio of variance of additive genetic values to  
516 total phenotypic variance:

$$h^2 = \sigma^2(A) / \sigma^2(z) \quad (12)$$

518  
519 The additive genetic value,  $A$ , of an organism is defined as the sum of additive effects of its alleles at  
520 the trait’s QTLs. We provide the technical definition of additive effect later on and note here that  $h^2$   
521 represents the largest proportion of phenotypic variance that can be explained by linear regression on  
522 the allele contents at single QTLs, ignoring epistatic (inter-locus) and dominance interactions (Lynch  
523 and Walsh, 1998). As discussed shortly, for sexually reproducing species,  $h^2$  has two main advantages to  
524  $H^2$ : (i) it can be estimated from empirical data of genetically related (but not identical) organisms; (ii)  
525 it can be used to predict the response to selection for traits associated with reproductive fitness.

526 *Measuring the resemblance between relatives*

527 Relatives resemble each other not only for carrying similar sets of alleles but also for living in similar  
528 environments. Thus, it is necessary to disentangle the concept of resemblance from that of genetic  
529 determination.

530 Considering an ordered relationship such as parent-offspring, the least squares regression slope of  
531 offspring values on mean parental values is defined as

$$b = s(z_o, z_{mp}) / s^2(z_{mp}) \quad (13)$$

532 where  $z_o$  and  $z_{mp}$  denote observed offspring and mean parent values, and  $s(\cdot, \cdot)$  denotes sample covariance  
533 among observed couples of values (Lynch and Walsh, 1998). Assuming no systematic dissimilarity between  
534 parents and offspring,  $b$  is a value between 0 and 1, higher values indicating closer resemblance between  
535 the expected phenotype of offspring and the mid-phenotype of their parents.

536 Considering members of unordered relationships, such as identical twins, sibs and cousins, the  
537 resemblance between members within groups is measured by the intraclass correlation (ICC) defined  
538 as the ratio of the “between group” variance over the total variance,  $r_A = \sigma^2(c) / \sigma^2(z)$ ,  $c$  denoting the  
539 observed within-group means (Fisher, 1925; Lynch and Walsh, 1998). Given a dataset of measurements  
540 grouped by a factor such as twinship, the standard estimation procedure for  $r_A$  is the one-way analysis of  
541 variance - ANOVA (see, e.g. (Donner, 1986) or ch. 18 in (Lynch and Walsh, 1998)). ANOVA uses mean  
542 squares to find estimators for the between- and within-group variances,  $\hat{\sigma}^2(c)$  and  $\hat{\sigma}^2(z - c)$  and reports

543 ICC as the ratio:

$$r_A = \frac{\hat{\sigma}^2(c)}{\hat{\sigma}^2(c) + \hat{\sigma}^2(z-c)} \quad (14)$$

544 We notice that both,  $R_{adj}^2$  (eq. 11) and  $r_A$  (eq. 14), are estimators of ICC, but there is a key difference  
 545 in their assumptions:  $R_{adj}^2$  assumes that all possible groups, i.e. genotypes, are present in the data but  
 546 makes no explicit assumption about the distribution of group means (i.e. genotypic values);  $r_A$  is aware  
 547 that only a subset of all possible groups is present in the data but assumes that the observed group  
 548 means, are an i.i.d. sample from a normal distribution.

549 *Measuring the efficiency of selection*

550 In breeding experiments the goal is to optimize a trait by repetitive artificial selection for reproduction  
 551 of the “best” individuals in a generation. A textbook example is truncation selection in which only  
 552 individuals with measurements above a given threshold are allowed to reproduce. For a generation, the  
 553 difference  $\Delta_s = \mu_s - \mu$  between the mean value of individuals selected for reproduction,  $\mu_s$ , and the mean  
 554 of the generation,  $\mu$ , is called the selection differential. Denoting by the mean of the offspring generation,  
 555 the difference  $R = \mu_o - \mu$ , is called the response to selection. Then, the efficiency of the truncation selection  
 556 is measured by the **realized heritability** (Hartyl and Clark, 2007), defined as the ratio:

$$h_R^2 = R/\Delta_s \quad (15)$$

557 *Definition of additive genetic effect and additive genetic value*

558 So far, we have skipped the more technical definition of additive genetic effect, which is the basis of the  
 559 definitions of additive genetic value and narrow-sense heritability. Here we provide these definitions in  
 560 the context of haploid organisms, noting that the definitions for diploid organisms found in textbooks  
 561 (Falconer, 1996; Lynch and Walsh, 1998) are conceptually the same but somewhat more complicated for  
 562 they treat dominance interactions separately from epistatic interactions.

We assume that a trait has a finite number of QTLs,  $L$ , with a finite number of alleles  $M_l \geq 2$  for each locus  $l = 1, \dots, L$ . Denoting by  $x_{lm}$  the content (0 or 1) of allele  $m$  at locus  $l$ ,  $l = 1, \dots, L$ ,  $m = 1, \dots, M_l$ , we can describe an individual’s genotype by a binary vector  $\mathbf{x}$  of length  $\sum_{1 \leq l \leq L} M_l$ . The products of allele contents for different loci signify the presence or absence of allele combinations in a genotype. This representation results in the system of equations 16, in which the genotypic value of each genotype  $\mathbf{x}$  is written as a sum of the population mean,  $\mu$ , and the effects  $\eta_{lm}$ ,  $(\eta\eta)_{l_1 m_1 l_2 m_2}$  and so on, associated with each allele, couple of alleles at two loci and higher order- (up to order  $L$ ) multi-locus configurations of alleles, present in the

genotype.

$$G_{\mathbf{x}} = \mu + \sum_{l \leq L} \sum_{m \leq M_l} \eta_{lm} x_{lm} + \sum_{l_1 \neq l_2} \sum_{\substack{m_1 \leq M_{l_1} \\ m_2 \leq M_{l_2}}} (\eta\eta)_{l_1 m_1 l_2 m_2} x_{l_1 m_1} x_{l_2 m_2} + \dots \quad (16)$$

563 If for a moment we imagine that in system of equations  $G_{\mathbf{x}}$ ,  $\mu$ , and  $\mathbf{x}$  are known while the  $(\eta\dots)$ 's are  
 564 unknown, from an algebraic point of view, there exist infinitely many combinations of  $(\eta\dots)$ 's solving the  
 565 system, because there are more unknowns than equations. From the point of view of genetics, however,  
 566 useful solutions are only those that maximize the proportion of variance in the genotypic values explained  
 567 by the effects of single alleles or low-order allele combinations. This reasoning finds a mathematical  
 568 reflection in the ordinary least squares (OLS) solution for the linear regression of  $G_{\mathbf{x}}$  on single-locus  
 569 allele contents  $\mathbf{x}$  (system 16 taken without the grey-shaded higher order terms on the right). Denoting  
 570 by  $f_{\mathbf{x}}$  the frequency of genotype  $\mathbf{x}$  among individuals in the population, the vector of OLS coefficients,  
 571  $\eta^*$ , is found as a solution to the optimization task 17:

$$\eta^* = \operatorname{argmin}_{\eta} \sum_{\mathbf{x}} f_{\mathbf{x}} (G_{\mathbf{x}} - \mu - \sum_{l \leq L} \sum_{m \leq M_l} \eta_{lm} x_{lm})^2 \quad (17)$$

572 The elements  $\eta_{lm}^*$  of any vector  $\eta^*$  solving this optimization task are called **additive allele effects**  
 573 and the sum  $A_{\mathbf{x}} = \sum_{l \leq L} \sum_{m \leq M_l} \eta_{lm}^* x_{lm}$  is called **additive genetic value** of the genotype  $\mathbf{x}$ . As a detail, we  
 574 clarify that for multiple QTLs ( $L > 1$ ) the vector  $\eta^*$  solving 17 is not uniquely defined because for each  
 575 locus one of the allele contents can be expressed as a function of the others, i.e. the design matrix of the  
 576 linear model is not of full rank. However the additive genetic values are invariant to the exact choice of  
 577  $\eta^*$ .

578

## 579 Software

580 This study relies on the accompanying R-package “patherit”. The used version of this package, together  
 581 with all program-code used for the toy-model simulations and the analysis of HIV-data, are provided  
 582 in the attached file SP.zip. Inside it, a file named ReadMe.txt contains further instructions on how to  
 583 run the code. The sub-sections below provide details on the implementation of the different heritability  
 584 estimators and the toy-model simulations.

### 585 *Direct measurement of $H^2$ in simulated data*

586 To measure  $H^2$ , we used the direct estimate  $R_{adj}^2$  (Eq. 11) after grouping the patients in the data by  
 587 their (currently carried) pathogen genotype and estimating the genotypic values as the group means  
 588 (implemented as function R2adj in the patherit package).

589 *Calculating donor-recipient regression slope*

590 The value of the donor-recipient regression slope ( $b_0, b_{D_1}, b_\tau$ ) was calculated using eq. 13, implemented  
591 as a function called “b” in the patherit package.

592 *Calculating  $r_A$*

593 To estimate  $r_A$  we implemented one-way ANOVA as a function “rA” in the package patherit. As a  
594 reference we used the description in chapter 18 of (Lynch and Walsh, 1998). To calculate confidence  
595 intervals, we used the R-package “boot” to perform 1,000-replicate bootstraps, upon which we called  
596 the package function `boot.ci()` with `type=”basic”`. These confidence intervals were fully contained in the  
597 standard ANOVA confidence intervals based on the F-distribution (see (Lynch and Walsh, 1998)), which  
598 were slightly wider (not reported).

599

600 *POUMM and PMM inference*

601 The POUMM and PMM inference was based on an early version of the POUMM R-package (Mitov  
602 and Stadler, 2017). Since the interface of the POUMM package has evolved considerably between the  
603 version used in this analysis and the version 1.2.1 released on the Comprehensive R Archive Network  
604 (CRAN, <https://cran.r-project.org>) at the time of writing this article. To facilitate reproducibility, the  
605 source-code of the early version used in this analysis has been included in the accompanying package  
606 ‘patherit’.

607 We performed maximum likelihood (ML) fits of the POUMM method in all toy model simulations. For  
608 each simulated transmission tree, the conditional likelihood of the trait-values at the tips was maximized  
609 over the parameters  $\alpha, \theta, \sigma, \sigma_e$  and  $g_0$  (function `ml.poumm` of the patherit package). In the PMM ML  
610 fits the conditional likelihood of the data was redefined as its corresponding limit for  $\alpha \rightarrow 0$  and was  
611 maximized over the parameters  $\sigma, \sigma_e$  and  $g_0$  (ignoring  $\theta$ , which cancels out in the case  $\alpha \rightarrow 0$ ). To avoid  
612 potential issues with floating point arithmetic all branch lengths were scaled-down 100 times before ML  
613 fit. This preprocessing step is invariant with respect to the estimated heritability, since it only causes  
614 rescaling of the OU parameters:  $\sigma^2 \rightarrow \sigma^2 \times 100; \alpha \rightarrow \alpha \times 100$  (see eq. 5).

615 For HIV data, in addition to an ML-fit, we performed a Markov Chain Monte Carlo (MCMC)  
616 fit (function `mcmc.poumm` of the patherit package) using an adaptive Metropolis algorithm with  
617 coerced acceptance rate (Vihola, 2012) written in R (Scheidtger, 2012). The MCMC sampling was  
618 performed on the POUMM parameters  $\alpha, \theta, \sigma^2$  and  $\sigma_e^2$ . The prior was specified as a joint distribution  
619 of four independent variables:  $(\alpha, \theta, \sigma^2, \sigma_e^2) \sim \text{Exp}(0.01) \times \mathcal{U}(0, 100) \times \text{Exp}(0, 10^{-4}) \times \text{Exp}(0.01)$ . These low

620 exponential rates and the large interval of the uniform distribution were chosen such in order to ensure  
621 that the prior is weakly informed, both, for the sampled parameters  $\alpha$ ,  $\theta$ ,  $\sigma^2$ ,  $\sigma_e^2$  and for the inferred  
622 heritability estimates  $H_{OU}^2$ ,  $H_{OUe}^2$ . This is verified by the nearly flat prior densities contrasting with  
623 sharply peaked posterior densities (compare blue versus black curves on supplementary fig. S4 B). The  
624 initial values for the parameters were set to  $(\alpha, \theta, \sigma^2, \sigma_e^2)_0 = (0, 0, 1, 1)$ . The adaptive Metropolis MCMC  
625 was run for  $4.2E+06$  iterations, of which the first  $2E+05$  were used for warm-up and adaptation of the  
626 jump distribution variance-covariance matrix. The target acceptance rate was set to 0.01 and the thinning  
627 interval was set to 1,000. The convergence and mixing of the MCMC was validated by visual analysis  
628 (supplementary fig. S4 A) as well as by comparison to a parallel MCMC-chain started from a different  
629 initial state. The presence of signal in the data was confirmed by the observed difference between prior  
630 (blue) and posterior (black) densities (see supplementary fig. S4 B). Calculation of 95% CI was done  
631 using the function “HPDinterval” from the coda package (Plummer *et al.*, 2006).

### 632 *Computer simulations of the toy epidemiological model*

633 The toy-model SIR simulation is implemented in the function “simulateEpidemic” of the patherit package;  
634 the extraction of diagnosed donor-recipient couples – in the function “extractDRCouples”; the extraction  
635 of a transmission tree from diagnosed individuals – in the function “extractTree”.

636 At the between-host level, the phenomena of birth, contact, transmission, recovery and death define  
637 the dynamics between the compartments of susceptibles, infected and recovered individuals -  $X$ ,  $Y$  and  $Z$ .  
638 The natural birth rate,  $\lambda_{\text{nat}}$ , and the natural per capita death rate,  $\delta_{\text{nat}}$ , are defined as constants satisfying  
639  $\lambda_{\text{nat}} = \delta_{\text{nat}} N_0$ , so that the average lifespan of an uninfected individual equals  $1/\delta_{\text{nat}} = 850$  (arbitrary) time  
640 units and in a disease-free population the total number of alive individuals equilibrates at  $N_0 = 10^5$ . An  
641 epidemic starts with the migration of an individual with random immune system type carrying pathogen  
642 strain 1:11 to a fully susceptible population of  $N_0$  individuals. Each individual has contacts with other  
643 individuals occurring randomly at a constant rate,  $\kappa$ . A transmission can occur upon a contact involving  
644 an infected and a susceptible individual, here, called a “risky” contact. It is assumed that the probability  
645 of transmission per risky contact,  $\gamma$ , is either a constant (black on fig. 3B) or a function of the value  
646  $z$  (magenta on Fig. 3B) of the infected host and does not depend on the uninfected individual. Once  
647 infected, a host starts transmitting its currently dominant pathogen strain at a rate defined as the product  
648 of  $\gamma$ ,  $\kappa$ , and the current proportion of susceptible individuals in the population,  $S = X/N$ . Thus, for fixed  
649  $\kappa$ , the transmission rate of an infected host is a function of the global variable  $S$  and the constant or  
650 variable  $\gamma$ . This transmission process continues until recovery or death of the host. Recovery has the

651 meaning of a medical check occurring at a constant per capita rate,  $\rho$ , followed by immediate therapy  
652 and immunity. Due to the virulence of the pathogen, an infected host has an increased (per capita) death  
653 rate,  $\delta$ , which is defined either as a constant or as a function of  $z$ . Based on their scope of action, we call  
654 “between-host” the parameters  $\lambda_{\text{nat}}$ ,  $\delta_{\text{nat}}$ ,  $\kappa$ ,  $\gamma$ ,  $\rho$  and  $\delta$ .

655 Within a host, mutants of the dominant strain can appear at any time as a result of random single-  
656 locus mutations, which occur at a constant or  $z$ -dependent rate,  $\nu$ . It is important to make a distinction  
657 between a mutation and a substitution of a mutant strain for a dominant strain within a host, because  
658 a mutation doesn’t necessarily lead to a substitution. For example, when  $z$  is (or correlates with) the  
659 within-host reproductive fitness of the pathogen, substitutions would result only from mutations causing  
660 an increase in  $z$ . The rate of substitution of a mutant strain  $\mathbf{x}_j$  for a dominant strain  $\mathbf{x}_i$ , differing by a  
661 single nucleotide at a locus  $l$ , is denoted  $\xi_{l,i \leftarrow j}$  and defined as a function of  $\nu$ , the number of alleles at the  
662 locus,  $M_l$ , and the presence or absence of within-host selection with respect to  $z$ . No substitution can  
663 occur between strains differing at more than one locus, although, the same effect can result from two or  
664 more consecutive substitutions. Based on their scope of action, we call “within-host” the parameters  $\nu$   
665 and  $\xi$ .

666 The parameters  $\lambda_{\text{nat}}$ ,  $\delta_{\text{nat}}$ ,  $\kappa$  and  $\rho$  were kept as global constants as written in table 1.

667 The simulations were implemented as stochastic random sampling of within- and between-host events  
668 (i.e. risky contact, transmission, mutation, diagnosis, death) in discrete time-steps of length 0.05  
669 (arbitrary time-units). Each simulation was run for  $\min(4t_{10k}, 2400)$  time-units, where  $t_{10k}$  denotes the  
670 time for the simulation until reaching 10,000 diagnosed individuals. The data generated after reaching  
671 10,000 diagnoses has not been used in this study but it is intended for future analysis of post-outbreak  
672 dynamics, i.e. epidemic waves occurring after exhaustion of the susceptible pool. The transmission history  
673 as well as the history of within-host strain substitutions was preserved during the simulations in order to  
674 reproduce exact transmission trees and to extract donor and recipient values at moments of transmission  
675 for the calculation of  $b_0$ .

#### 676 *External dependencies*

677 The following third-party R-packages were used: ape v3.4 (Paradis *et al.*, 2004), data.table v1.9.6 (Dowle  
678 *et al.*, 2014), adaptMCMC v1.1 (Scheidegger, 2012), Rmpfr v0.6-0 (Maechler, 2014), and coda v0.18-  
679 1 (Plummer *et al.*, 2006). All programs have been run on R v3.2.4 (R Core Team, 2013).

#### 680 **Supplementary Material**

681 Supplementary notes, figures S1-S4 and supplementary programs are available online.



## 682 Acknowledgments

683 This work was supported by the Eidgenössische Technische Hochschule Zrich and in part by the European  
684 Research Council under the 7th Framework Programme of the European Commission (PhyPD: Grant  
685 Agreement Number 335529).

686 The authors thank Dr. Emma Hodcroft for sending the UK phylogeny in Newick format together with  
687 the associated spVL values, Dr. Gabriel Leventhal and prof. Sebastian Bonhoeffer for valuable insights  
688 on donor-recipient regression and Dr. David Rasmussen for a careful review of the manuscript.

## 689 References

- 690 Alizon, S., von Wyl, V., Stadler, T., Kouyos, R. D., Yerly, S., Hirschel, B., Böni, J., Shah, C., Klimkait, T., Furrer, H.,  
691 Rauch, A., Vernazza, P. L., Bernasconi, E., Battegay, M., Bürgisser, P., Telenti, A., Günthard, H. F., Bonhoeffer, S.,  
692 and Swiss HIV Cohort Study 2010. Phylogenetic approach reveals that virus genotype largely determines HIV set-point  
693 viral load. *PLoS pathogens*, 6(9): e1001123.
- 694 Anderson, T. J. C., Williams, J. T., Nair, S., Sudimack, D., Barends, M., Jaidee, A., Price, R. N., and Nosten, F.  
695 2010. Inferred relatedness and heritability in malaria parasites. *Proceedings of the Royal Society B-Biological Sciences*,  
696 277(1693): 2531–2540.
- 697 Bjorn-Mortensen, K., Soborg, B., Koch, A., Ladefoged, K., Merker, M., Lillebaek, T., Andersen, A. B., Niemann, S., and  
698 Kohl, T. A. 2016. Tracing Mycobacterium tuberculosis transmission by whole genome sequencing in a high incidence  
699 setting: a retrospective population-based study in East Greenland. *Scientific reports*, 6: 33180.
- 700 Bonhoeffer, S., Fraser, C., and Leventhal, G. E. 2015. High Heritability Is Compatible with the Broad Distribution of Set  
701 Point Viral Load in HIV Carriers. *PLoS pathogens*, 11(2): e1004634–e1004634.
- 702 Dessau, M., Goldhill, D., McBride, R. L., Turner, P. E., and Modis, Y. 2012. Selective Pressure Causes an RNA Virus to  
703 Trade Reproductive Fitness for Increased Structural and Thermal Stability of a Viral Enzyme. *PLOS Genetics*, 8(11).
- 704 Donner, A. 1986. A Review of Inference Procedures for the Intraclass Correlation Coefficient in the One-Way Random  
705 Effects Model. *International Statistical Review*, 54(1): 67–82.
- 706 Dowle, M., Short, T., Liangolou, S., and Srinivasan, A. 2014. data.table: Extension of data.frame. page 9.
- 707 Falconer, D. S. 1996. *Introduction to Quantitative Genetics*. San Val, Incorporated.
- 708 Felsenstein, J. 1988. Phylogenies And Quantitative Characters. *Annual Review of Ecology and Systematics*, 19(1): 445–471.
- 709 Fisher, R. A. 1925. *Statistical Methods For Research Workers*. Genesis Publishing Pvt Ltd.
- 710 FitzJohn, R. G. 2012. Diversitree: comparative phylogenetic analyses of diversification in R. *Methods in Ecology and*  
711 *Evolution*, 3(6): 1084–1092.
- 712 Fraser, C., Hollingsworth, T. D., Chapman, R., de Wolf, F., and Hanage, W. P. 2007. Variation in HIV-1 set-point viral  
713 load: epidemiological analysis and an evolutionary hypothesis. *Proceedings of the National Academy of Sciences of the*  
714 *United States of America*, 104(44): 17441–17446.
- 715 Fraser, C., Lythgoe, K., Leventhal, G. E., Shirreff, G., Hollingsworth, T. D., Alizon, S., and Bonhoeffer, S. 2014. Virulence and  
716 Pathogenesis of HIV-1 Infection: An Evolutionary Perspective. *Science (New York, N. Y.)*, 343(6177): 1243727–1243727.
- 717 Freckleton, R. P., Harvey, P. H., and Pagel, M. 2002. Phylogenetic analysis and comparative data: a test and review of  
718 evidence. *The American Naturalist*, 160(6): 712–726.

- 719 Geskus, R. B., Prins, M., Hubert, J.-B., Miedema, F., Berkhout, B., Rouzioux, C., Delfraissy, J.-F., and Meyer, L. 2007.  
720 The HIV RNA setpoint theory revisited. *Retrovirology*, 4(1): 65.
- 721 Grimmett, G. and Stirzaker, D. 2001. *Probability and Random Processes*. Oxford University Press.
- 722 Hansen, T. F. 1997. Stabilizing Selection and the Comparative Analysis of Adaptation. *Evolution; international journal of*  
723 *organic evolution*, 51(5): 1341–1351.
- 724 Hansen, T. F. and Bartoszek, K. 2012. Interpreting the evolutionary regression: the interplay between observational and  
725 biological errors in phylogenetic comparative studies. *bioRxiv*, 61(3): 413–425.
- 726 Hartyl, D. L. and Clark, A. G. 2007. *Principles of population genetics*. Sinauer Associates.
- 727 Hecht, F. M., Hartogensis, W., Bragg, L., Bacchetti, P., Atchison, R., Grant, R., Barbour, J., and Deeks, S. G. 2010. HIV  
728 RNA level in early infection is predicted by viral load in the transmission source. *AIDS (London, England)*, 24(7):  
729 941–945.
- 730 Hodcroft, E., Hadfield, J. D., Fearnhill, E., Phillips, A., Dunn, D., O’Shea, S., Pillay, D., Brown, A. J. L., Database, o.  
731 b. o. t. U. H. D. R., and Study, t. U. C. 2014. The Contribution of Viral Genotype to Plasma Viral Set-Point in HIV  
732 Infection. *PLoS pathogens*, 10(5): e1004112.
- 733 Hollingsworth, T. D., Laeyendecker, O., Shirreff, G., Donnelly, C. A., Serwadda, D., Wawer, M. J., Kiwanuka, N., Nalugoda,  
734 F., Collinson-Streng, A., Ssempijja, V., Hanage, W. P., Quinn, T. C., Gray, R. H., and Fraser, C. 2010. HIV-1 transmitting  
735 couples have similar viral load set-points in Rakai, Uganda. *PLoS pathogens*, 6(5): e1000876.
- 736 Housworth, E. A., Martins, E. P., and Lynch, M. 2004. The phylogenetic mixed model. *The American Naturalist*, 163(1):  
737 84–96.
- 738 Hu, S., Clewley, J. P., Cane, P. A., and Pillay, D. 2004. HIV-1 pol gene variation is sufficient for reconstruction of  
739 transmissions in the era of antiretroviral therapy. *AIDS (London, England)*, 18(5): 719–728.
- 740 Jacquard, A. 1983. Heritability: One Word, Three Concepts. *Biometrics*, 39(2): 465.
- 741 Keele, B. F., Giorgi, E. E., Salazar-Gonzalez, J. F., Decker, J. M., Pham, K. T., Salazar, M. G., Sun, C., Grayson, T., Wang,  
742 S., Li, H., Wei, X., Jiang, C., Kirchherr, J. L., Gao, F., Anderson, J. A., Ping, L.-H., Swanstrom, R., Tomaras, G. D.,  
743 Blattner, W. A., Goepfert, P. A., Kilby, J. M., Saag, M. S., Delwart, E. L., Busch, M. P., Cohen, M. S., Montefiori,  
744 D. C., Haynes, B. F., Gaschen, B., Athreya, G. S., Lee, H. Y., Wood, N., Seoighe, C., Perelson, A. S., Bhattacharya,  
745 T., Korber, B. T., Hahn, B. H., and Shaw, G. M. 2008. Identification and Characterization of Transmitted and Early  
746 Founder Virus Envelopes in Primary HIV-1 Infection. *Proceedings of the National Academy of Sciences of the United*  
747 *States of America*, 105(21): 7552–7557.
- 748 Keeling, M. J. and Rohani, P. 2007. *Modeling Infectious Diseases in Humans and Animals*. Princeton University Press.
- 749 LANDE, R. 1976. Natural-Selection and Random Genetic Drift in Phenotypic Evolution. *Evolution; international journal*  
750 *of organic evolution*, 30(2): 314–334.
- 751 Leventhal, G. E. and Bonhoeffer, S. 2016. Potential Pitfalls in Estimating Viral Load Heritability. *Trends in microbiology*.
- 752 Lingappa, J. R., Thomas, K. K., Hughes, J. P., Baeten, J. M., Wald, A., Farquhar, C., de Bruyn, G., Fife, K. H., Campbell,  
753 M. S., Kapiga, S., Mullins, J. I., and Connie Celum, f. t. P. i. P. H. H. T. S. T. 2013. Partner Characteristics Predicting  
754 HIV-1 Set Point in Sexually Acquired HIV-1 Among African Seroconverters. *www.liebertpub.com*, 29(1): 164–171.
- 755 Lynch, M. 1991. Methods for the Analysis of Comparative Data in Evolutionary Biology. *Evolution; international journal*  
756 *of organic evolution*, 45(5): 1065–1080.
- 757 Lynch, M. and Walsh, B. 1998. *Genetics and Analysis of Quantitative Traits*. Sinauer Associates Incorporated.

- 758 Lythgoe, K. A. and Fraser, C. 2012. New insights into the evolutionary rate of HIV-1 at the within-host and epidemiological  
759 levels. *Proceedings: Biological Sciences*, 279(1741): 3367–3375.
- 760 Maechler, M. 2014. Rmpfr: R MPFR - Multiple Precision Floating-Point Reliable.
- 761 Mellors, J. W., Rinaldo, C. R., Gupta, P., White, R. M., Todd, J. A., and Kingsley, L. A. 1996. Prognosis in HIV-1 infection  
762 predicted by the quantity of virus in plasma. *Science (New York, N.Y.)*, 272(5265): 1167–1170.
- 763 Metzner, K. J. 2016. HIV Whole-Genome Sequencing Now: Answering Still-Open Questions. *Journal of clinical microbiology*,  
764 54(4): 834–835.
- 765 Mitov, V. and Stadler, T. 2017. POUMM: An R-package for Bayesian Inference of Phylogenetic Heritability.
- 766 Paradis, E., Claude, J., and Strimmer, K. 2004. APE: Analyses of Phylogenetics and Evolution in R language.  
767 *Bioinformatics*, 20(2): 289–290.
- 768 Plummer, M., Best, N., Cowles, K., and Vines, K. 2006. CODA: Convergence Diagnosis and Output Analysis for MCMC.  
769 *R News*, 6: 7–11.
- 770 Presloid, J. B., Mohammad, T. F., Lauring, A. S., and Novella, I. S. 2016. Antigenic diversification is correlated with  
771 increased thermostability in a mammalian virus. *Virology*, 496: 203–214.
- 772 R Core Team 2013. R: A Language and Environment for Statistical Computing.
- 773 Scheidegger, A. 2012. adaptMCMC: Implementation of a generic adaptive Monte Carlo Markov Chain sampler.
- 774 Shirreff, G., Alizon, S., Cori, A., Günthard, H. F., Laeyendecker, O., van Sighem, A., Bezemer, D., and Fraser, C. 2013.  
775 How effectively can HIV phylogenies be used to measure heritability? *Evolution, Medicine, and Public Health*, 2013(1):  
776 209–224.
- 777 Tang, J., Tang, S., Lobashevsky, E., Zulu, I., Aldrovandi, G., Allen, S., Kaslow, R. A., and Zambia-UAB HIV Research  
778 Project 2004. HLA allele sharing and HIV type 1 viremia in seroconverting Zambians with known transmitting partners.  
779 *AIDS research and human retroviruses*, 20(1): 19–25.
- 780 Uhlenbeck, G. E. and Ornstein, L. S. 1930. On the Theory of the Brownian Motion. *Physical Review*, 36(5): 823–841.
- 781 van der Kuyl, A. C., Jurriaans, S., Pollakis, G., Bakker, M., and Cornelissen, M. 2010. HIV RNA levels in transmission  
782 sources only weakly predict plasma viral load in recipients. *AIDS (London, England)*, 24(10): 1607–1608.
- 783 Vihola, M. 2012. Robust adaptive Metropolis algorithm with coerced acceptance rate. *Statistics and Computing*, 22(5):  
784 997–1008.
- 785 Virgin, H. W., Wherry, E. J., and Ahmed, R. 2009. Redefining Chronic Viral Infection. *Cell*, 138(1): 30–50.
- 786 Wright, S. 1934. The Method of Path Coefficients. *The Annals of Mathematical Statistics*, 5(3): 161–215.
- 787 Yue, L., Prentice, H. A., Farmer, P., Song, W., He, D., Lakhi, S., Goepfert, P., Gilmour, J., Allen, S., Tang, J., Kaslow, R. A.,  
788 and Hunter, E. 2013. Cumulative impact of host and viral factors on HIV-1 viral-load control during early infection.  
789 *Journal of Virology*, 87(2): 708–715.
